1 **PERK inhibition blocks metastasis initiation by limiting UPR-**  
2 **dependent survival of dormant disseminated cancer cells.**

3

4

5 Veronica Calvo<sup>1,3</sup>, Wei Zheng<sup>1</sup>, Kirk A. Staschke<sup>2</sup>, Julie Cheung<sup>1</sup>, Ana Rita Nobre<sup>1</sup>, Eduardo F.  
6 Farias<sup>1,3</sup>, Ari Nowacek<sup>3</sup>, Mark Mulvihill<sup>3</sup>, Alan C. Rigby<sup>3</sup>, & Julio A. Aguirre-Ghiso<sup>1\*</sup>

7

8

9 <sup>1</sup>Division of Hematology and Oncology, Department of Medicine and Department of  
10 Otolaryngology, Tisch Cancer Institute, Icahn School of Medicine at Mount Sinai, New York,  
11 NY, USA. <sup>2</sup>Department of Biochemistry and Molecular Biology, Indiana University School of  
12 Medicine, Indiana University Melvin and Bren Simon Comprehensive Cancer Center,  
13 Indianapolis, IN, USA <sup>3</sup>HiberCell, Inc, 619 West 54th Street, 8th Floor, New York, NY USA.

14

15 \*Corresponding author: [julio.aguirre-ghiso@mssm.edu](mailto:julio.aguirre-ghiso@mssm.edu)

16 **Abstract**

17 The unfolded protein response (UPR) kinase PERK has been shown to serve as a survival  
18 factor for HER2-driven breast and prostate cancers as well as for dormant cancer cells.  
19 However, its role in metastasis is not understood. Here we found in the MMTV-HER2 mouse  
20 model that quiescent HER2+ disseminated cancer cells (DCCs) displayed unresolved ER  
21 stress as revealed by high expression of the PERK-inducible GADD34 gene. Single cell gene  
22 expression profiling and imaging confirmed that a significant proportion of DCCs in lungs were  
23 dormant and displayed an active UPR. In human breast cancer metastasis biopsies, GADD34  
24 expression and quiescence were also positively correlated. Importantly, PERK inhibition with a  
25 specific inhibitor (HC4) blunted metastasis development by selectively killing UPR<sup>high</sup> quiescent  
26 but not proliferative DCCs. We also show that PERK inhibition altered optimal HER2 activity in  
27 primary tumors as a result of sub-optimal HER2 trafficking and phosphorylation in response to  
28 EGF. Our data identify PERK as a unique “Achilles heel” in dormant DCCs, supporting a  
29 requisite role for PERK in DCCs. Taken together, these data identify novel strategies to  
30 eliminate quiescent DCCs in patients with disseminated cancer disease.



## 31 INTRODUCTION

32 Under stress conditions, the accumulation of unfolded proteins in the endoplasmic  
33 reticulum (ER) lumen activates three main pathways: PERK, IRE1 $\alpha$  and ATF6. These  
34 pathways are part of a survival and adaptive mechanism known as the unfolded protein  
35 response (UPR) (Walter and Ron, 2011). Recent evidence suggests that in various types of  
36 cancer the UPR allows tumor cells to respond to increased demands on the ER and greater  
37 oxidative conditions imposed by an enhanced translational load caused by oncogenes,  
38 hypoxia, and other stress conditions (Blais et al., 2004; Chevet et al., 2015; Tameire et al.,  
39 2015). Oncogene-activated pathways increase ER client protein load by activating mTOR  
40 signaling and translation initiation (Hart et al., 2012; Ozcan et al., 2008; Tameire et al., 2015).  
41 Other studies have shown that PERK and the IRE1 $\alpha$ -XBP-1 pathways contribute to the ability  
42 of cancer cells to adapt to hypoxia and microenvironmental stress (Bi et al., 2005; Blais et al.,  
43 2004; Chen et al., 2014; Romero-Ramirez et al., 2009; Rouschop et al., 2010; Schewe and  
44 Aguirre-Ghiso, 2008; Ye et al.), suggesting that the UPR enables critical adaptation  
45 mechanisms necessary to survive within a changing cellular milieu.

46 PERK activation initiates an antioxidant and autophagic response that coordinates a  
47 protection mechanism for mammary epithelial cells during loss of adhesion to the basement  
48 membrane (Avivar-Valderas et al., 2011). This survival response involves an ATF4 and CHOP  
49 transcriptional program (Avivar-Valderas et al., 2011) coupled to a rapid activation of the LKB1-  
50 AMPK-TSC2 pathway that inhibits mTOR (Avivar-Valderas et al., 2013). Human ductal  
51 carcinoma in situ (DCIS) lesions that displayed enhanced PERK phosphorylation, autophagy  
52 (Avivar-Valderas et al., 2011; Espina et al., 2010), and conditional ablation of PERK in the  
53 mammary epithelium had delayed mammary carcinogenesis promoted by the HER2 oncogene  
54 (Bobrovnikova-Marjon et al., 2010; Bobrovnikova-Marjon et al., 2008). Furthermore, HER2  
55 increases the levels of proteotoxicity in tumor cells thereby activating JNK and IRE signaling  
56 and allowing HER2+ cancer cells to cope with this stress (Singh et al., 2015). Accordingly, 8 %  
57 of HER2-amplified human breast tumors display an upregulation of PERK mRNA, which further  
58 supports the notion that certain HER2+ tumors are dependent on PERK and/or other UPR  
59 pathways for survival (cBIOportal database (Cerami et al., 2012)).

60 We also reported that dormant (quiescent) cancer cells were dependent on PERK and  
61 ATF6 signaling for survival (Ranganathan et al., 2008; Ranganathan et al., 2006; Schewe and  
62 Aguirre-Ghiso, 2008). Furthermore, solitary quiescent pancreatic DCCs disseminated to the

63 liver of mice also display a PERK-dependent UPR that was linked to loss of E-cadherin  
64 expression and downregulation of MHC-I, which favors immune evasion during dormancy  
65 (Pommier et al., 2018). In the MMTV-HER2 model, quiescent DCCs in bone marrow and lungs  
66 were also found to be E-cadherin negative (Harper et al., 2016), but the link to the UPR was  
67 not tested. Together, these data suggest that the UPR may serve as a stress and immune  
68 microenvironmental adaptive survival mechanism for DCCs.

69 Here we report that a previously described selective and potent inhibitor of PERK, HC4  
70 (Calvo et al., 2021) can block HER2-driven breast cancer metastasis through the eradication  
71 of dormant DCCs. Imaging and single cell gene expression profiling revealed the existence of  
72 an UPR<sup>high</sup>/CDK inhibitor<sup>high</sup> quiescent population of DCCs. In addition, CDK4/6 inhibition  
73 followed by HC4 treatment further decreased metastatic burden. Incidentally, PERK inhibition  
74 also prevented HER2-driven early cancer lesion development and induced stasis or regression  
75 of already established tumors *via* apoptosis. Our work reveals that PERK inhibitors, alone or in  
76 combination with anti-proliferative therapies, may represent a new strategy to target dormant  
77 cells during minimal residual disease stages and help prevent lethal metastases.

78

79

## 80 **RESULTS**

### 81 **Quiescent HER2+ DTCs display an ER stress response.**

82 PERK pathway activation has been shown to serve as a crucial effector of UPR-induced  
83 growth arrest and survival linked to a dormant phenotype (Brewer et al., 2000; Ranganathan  
84 et al., 2006 and 2008). In the syngeneic HER2+ breast cancer model MMTV-HER2, a high  
85 percentage of mice develop metastases to the lungs, which can be initiated by early or late  
86 DCCs (Guy et al., 1992; Harper et al., 2016; Husemann et al., 2008). Dormant DCCs display  
87 loss of E-cadherin and expression of Twist1 (Harper et al., 2016) and E-cadherin-negative  
88 DCCs in pancreatic cancer models were also shown to be quiescent and displayed  
89 upregulation of CHOP, a PERK-induced gene (Pommier et al., 2018). We set out to determine  
90 whether in the MMTV-HER2 spontaneous metastasis model if this same correlation between  
91 levels of PERK pathway activation and cell cycle arrest existed. The correlation was evaluated  
92 by two different approaches, high resolution imaging using immunofluorescence (IF) and single  
93 cell resolution gene expression analysis of DCCs and metastasis. We performed IF of MMTV-  
94 HER2 lung tissue sections of animals bearing large tumors and thus bearing dormant and  
95 proliferative DCCs (Harper et al., 2016). Tissues were co-stained to detect DCCs positive for

96 HER2, Ki67 (as a marker of proliferation) and GADD34 (or PPP1R15A). GADD34 is a PERK-  
97 inducible stress gene responsible for the programmed shift from translational repression (due  
98 to eIF2 $\alpha$  phosphorylation) to stress-induced gene expression (Novoa et al., 2003). Image  
99 analysis showed that HER2+ metastatic lesions or solitary DCCs with a low proliferative index  
100 (ki67<sup>low</sup>) presented high levels of ER stress as shown by high levels of GADD34 expression  
101 (**Fig. 1a upper panels and graph**). On the other hand, highly proliferative DCCs or lesions  
102 showed very low levels of GADD34 staining (**Fig. 1a lower panels and graph**). The two  
103 markers, Ki67 and GADD34, were anti-correlated in 100% of the cells, supporting that UPR<sup>high</sup>  
104 and quiescent DCCs and metastatic lesions can be identified via GADD34 detection.

105 We next tested if these correlations would also hold true in human breast metastatic  
106 lesions. HER2+ breast cancer metastases (n=10) to lymph node and additional 7 metastatic  
107 samples from different subtypes and tissues (lymph node, lung, liver) (**Supplementary Table**  
108 **1**) were stained with a pan-cytokeratin cocktail to identify the metastatic lesions, Ki67 and  
109 GADD34. We observed that advanced human metastatic lesions displayed a more  
110 heterogeneous pattern of staining for both markers between different patients and in-between  
111 different areas of the same lesion than in the mouse model. However, a consistent negative  
112 correlation between levels of proliferation (Ki67) and ER stress activation (GADD34) was  
113 found, in HER2+ LN metastasis (**Fig. 1b**) or other target organs as well (**Supplementary Table**  
114 **1**). This analysis validates the findings in the mouse models and that GADD34 may help identify  
115 UPR<sup>high</sup>/quiescent tumor cells in human metastatic sites.

116 Next, the analysis was expanded to markers of proliferation, quiescence, dormancy and  
117 ER stress in metastatic cells. To this end, we performed single cell targeted-gene expression  
118 analysis of DCCs, micro and macro-metastases lodged in lungs of MMTV-HER2 mice. Lungs  
119 from MMTV-HER2 females were processed into single cell suspensions and HER2+/CD45-  
120 cells were sorted (**Supplementary Fig. 1a**). The sorted cells were then processed for single  
121 cell separation, lysis, RT and pre-amplification using the C1 (Fluidigm) technology as shown in  
122 **Supplementary Fig. 1a**. This technique allowed us to isolate and process with a high degree  
123 of confidence (IF and molecular confirmation of HER2+ single cell) and quality 255 single DCCs  
124 and 90 primary tumor cells and their corresponding pools. Subsequently, high-throughput  
125 qPCR was used to analyze the expression of ER stress genes, cell cycle genes (both activators  
126 and inhibitors) and dormancy genes based on the literature (Kim et al., 2012; B'chir et al., 2013;  
127 Harper et al., 2016) (**Supplementary Fig. 1b**). The single cell resolution gene expression of

128 DCCs revealed the existence of two populations of cells that are enriched for ER stress genes  
129 (groups 1 and 2, 41% of DCCs) (**Fig. 1c**), Groups 1 and 2. Group 1 (approximately 19% of the  
130 DCCs) showed concomitant and strong upregulation of all the ER stress genes tested  
131 (including PERK itself) (green box) with negative regulators of cell proliferation such as Rb1  
132 and TP53 and CDK inhibitors p21, p27, p16 and p15 (pink box) (**Fig. 1c**). We also observed in  
133 these cells enrichment in the expression of dormancy genes such as NR2F1, DEC2 (*Bhlhe41*),  
134 TWIST1, CDH5, STAT3 and COL4A5 (Kim et al., 2012; Harper et al., 2016) (brown box). DCC  
135 group 2 (22%) also showed high levels of ER stress gene expression along with p21. In a third  
136 group (group 3 (6%)) ER stress, cell cycle inhibitors and dormancy genes were less prevalent,  
137 suggesting these might represent cells transiting out of dormancy or in cycling mode. In total,  
138 around 40% of the DCCs showed high to intermediate level of ER stress gene expression,  
139 concurrent with cell cycle inhibitors or dormancy genes. This is in range with the percentage of  
140 dormant DCCs detected in advanced progression MMTV-HER2 animals previously reported  
141 by our lab using phospho-Histone H3 and phospho-Rb detection (Harper et al., 2016). Taken  
142 together, these data illustrate that animals with detectable metastasis are comprised of ~40%  
143 DCCs that display high expression of cell cycle inhibitor genes. Importantly, we further  
144 demonstrate in this model that dormant DCC subpopulations display an unresolved UPR with  
145 prominent expression of PERK pathway genes.

146 We have further correlated quiescence with heightened UPR through pharmacological  
147 inhibition of the UPR via our PERK inhibitor and other standard of care agents. UPR<sup>high</sup> DCCs  
148 expressed higher levels of CDK inhibitors (**Fig. 1c**). Thus, we next asked whether treatment  
149 with a CDK4/6 inhibitor, Abemaciclib (50 mpk, 4 weeks), would result in decreased proliferation  
150 accompanied by an increase in UPR activation. Indeed, treatment of MMTV-HER2 females  
151 with Abemaciclib resulted in a striking increase in GADD34+ cells in primary tumor sections  
152 (**Fig. 1d**), which otherwise show very low and localized levels of GADD34 staining (*vehicle*).  
153 The increase in GADD34+ cells correlated with complete inhibition of proliferation as shown by  
154 Ki67 staining. An increase in GADD34 staining was also observed in lung metastases. This  
155 observation further supports the connection between induction of quiescence and UPR  
156 activation in primary tumor cells and disseminated cancer cells.

157

158 **PERK inhibition eradicates quiescent DCCs in bone marrow and lungs suppressing lung**  
159 **metastasis.**

160 The above findings opened the possibility of using selective PERK inhibitors to test  
161 whether inhibition of P-PERK could affect dormant DCC fate and metastasis formation. We  
162 used a PERK inhibitor derived from a 2-amino-3-amido-5-aryl-pyridine scaffold which we  
163 recently disclosed (Calvo et al., 2021). Briefly, HC4 was identified as a potent and selective  
164 PERK inhibitor with appropriate drug-like properties to support *in vivo* studies (Supplementary  
165 Table 7). HC4, along with other inhibitor variants from the amino-pyridine-mandelic acid-  
166 derived series (HC19, HC28), effectively decreased P-PERK (P-T980) levels in MCF10A cells  
167 expressing HER2 and in HEK293 cells stimulated with Tunicamycin (**Supplementary Fig. 1c**)  
168 as well as GADD43 induction upon thapsigargin treatment (**Supplementary Fig. 1d**) and  
169 rendered MCF10A/HER2 cells sensitive to low dose thapsigargin treatment. Taken together,  
170 these results showcase how selective inhibition of P-PERK with HC4 selectively affects  
171 adaptation to ER stress (**Supplementary Fig. 1e**). Using KINOMEscan™ kinase profiling  
172 (**Supplementary Tables 3-6**), HC4, HC19 and HC28 displayed high selectivity compared to  
173 other PERK inhibitors described in the literature and specifically GSK2656157 (Axten, 2017)  
174 even at a very high concentration (10  $\mu$ M). The high specificity of HC4 for EIF2AK3 (PERK)  
175 over the eIF2 $\alpha$  kinase family, EIF2AK1 (also known as HRI), EIF2AK2 (also known as PKR)  
176 and EIF2AK4 (also known as GCN2) or HER2 (**Supplementary Table 3**) indicates that the  
177 measured activity on eIF2 $\alpha$  was highly specific to PERK inhibition.

178 Single dose administration of HC4 in CD1 female mice demonstrated that the compound  
179 is bioavailable following IP administration using ethanol/oil formulation and that the levels of  
180 HC4 in the plasma achieve a threshold that is well above that needed for PERK inhibition based  
181 on biochemical and cellular P-PERK IC<sub>50</sub> values over a 24h time window (**Supplementary Fig.**  
182 **1f**).

183 We treated 24-32 week old uniparous MMTV-HER2 female mice (which present an  
184 incidence of lung metastases of around 80%) with vehicle (see methods) or HC4 (50 mpk) IP  
185 daily, for two weeks, and collected mammary glands, lungs, pancreas, bone marrow and  
186 tumors for further analyses. HC4 was well tolerated, with no significant changes in body weight.  
187 The inhibitor did not have a significant effect on bone marrow cell homeostasis or on peripheral  
188 blood white cells as shown by no effect on total cell counts from MMTV-HER2 females  
189 (**Supplementary Fig. 1g**).

190 PERK inhibition caused a significant decrease in P-PERK and P-eIF2 $\alpha$  levels in the  
191 mammary gland ducts and in pancreatic tissue (although only partial inhibition was observed



192 at this dose, especially in pancreatic islets) (**Fig. 2a**). We conclude that systemic HC4 delivery  
193 effectively inhibits PERK activation and eIF2 $\alpha$  phosphorylation. The inhibition of PERK did not  
194 fully deplete PERK activity, which may allow mice to control their pancreatic function and  
195 glucose levels (Yu et al., 2015). Moreover, in a separate study in mice dosed orally with HC4  
196 for 28 days, where similar exposures were achieved to the 50 mpk IP dose noted above, no  
197 deleterious effects on the pancreas or with clinical chemistry (ie insulin and glucose levels)  
198 were observed (data not shown).

199 MMTV-HER2 animals develop metastases to the lungs, which can be initiated early in  
200 progression (Guy et al., 1992; Harper et al., 2016; Husemann et al., 2008). Thus, we next  
201 monitored the effect of HC4 on metastatic disease in animals with small and/or palpable large  
202 tumors. All the vehicle-treated animals presented metastases detectable in sections stained  
203 with H&E. Lesions that displayed >100 cells were categorized as macro-metastases as they  
204 are also commonly positive for proliferation markers (**Fig. 1a**). The quantification of macro-  
205 metastases per animal (5 non-consecutive lung sections) revealed that, after just a two-week  
206 treatment, HC4 reduced the number and the incidence of macro-metastases (**Fig. 2b**) while  
207 not affecting the area of these metastases (**Supplementary Fig. 2a**). This suggested that  
208 PERK inhibition through HC4 might be acting on the initial steps of metastasis rather than  
209 shrinking established macro-metastases. Thus, we tested whether HC4 treatment might be  
210 affecting the intravasation of tumor cells from the primary site or the transition from solitary  
211 DCC to micro-metastasis (containing 2-100 cells). Detection of HER2+ circulating tumor cells  
212 (CTCs) directly in blood samples showed no significant difference between vehicle and HC4-  
213 treated animals (**Supplementary Fig. 2b**), indicating that HC4 is not grossly affecting the  
214 intravasation of tumor cells. On the other hand, detection of micro-metastasis and single DCCs  
215 using HER2 detection via IHC revealed a significant decrease in the number of micro-  
216 metastases in HC4-treated females (**Fig. 2c**). More than 80% of single DCCs in lungs are  
217 negative for P-Rb, indicating that they are mostly out of cycle and dormant. This measurement  
218 reproduces observations noted in our previous publication (Harper et al., 2016). HC4  
219 significantly reduced the number of non-proliferating (P-Rb negative) single DCCs that are  
220 commonly associated with blood vessels in lung sections, while not affecting the number of P-  
221 Rb positive solitary DCCs (**Fig. 2d**) or micrometastases (**Supplementary Fig. 2c**). Importantly,  
222 HC4 significantly decreased the number of DCCs found in bone marrow (**Fig. 2e**). In this organ,  
223 metastases never develop but DCCs are found at a high incidence and are dormant (Bragado

224 et al., 2013; Husemann et al., 2008). These results argue that PERK inhibition is selectively  
225 targeting non-proliferative dormant DCCs that display active PERK and UPR signaling.

226

227

228 **PERK inhibition blocks HER2-driven early and late mammary primary tumor**  
229 **progression.**

230 Having demonstrated that there is a dependency on PERK in quiescent UPR<sup>high</sup> DCCs,  
231 where dormancy is most relevant, we shifted our attention to primary tumor lesions. HER2-  
232 driven progression was found to be genetically dependent on the PERK kinase in the MMTV-  
233 HER2 model (Bobrovnikova-Marjon et al.) and a recent study showed that HER2+ tumors are  
234 sensitive to proteotoxicity and dependent on ERAD for survival (Singh et al., 2015). Further,  
235 cBIO database (Cerami et al., 2012) analysis showed that ~14% of HER2-amplified human  
236 breast tumors (Breast Invasive Carcinoma, TCGA, Nature 2012 dataset) display upregulation  
237 of the mRNA for PERK (**Supplementary Fig. 3a**). Thus, we investigated whether HC4 affected  
238 HER2-induced breast tumor progression in primary lesions where the different stages of  
239 progression from hyperplastic mammary glands through DCIS and invasive cancer can be  
240 dissected (Lu et al., 2010; Muller et al., 1988).

241 Analysis of 24-week old uniparous female mammary glands showed that vehicle-treated  
242 MMTV-HER2 animals exhibited ducts with secondary and tertiary dense branching (**Fig. 3a**,  
243 left panels), and histological analysis showed frequent mammary hyperplastic lesions (**Fig. 3a**,  
244 right panels, black arrows). In contrast, HC4-treated animals showed a “normalized” glandular  
245 architecture with less dense branching, resembling the mammary tree of non-transgenic  
246 normal FVB mice (**Supplementary Fig. 3b**). HC4-treated animals also showed a dramatic  
247 increase in the number of hollow lumen mammary gland ducts, constituting more than 60% of  
248 the structures compared with around 20% in control females (**Fig. 3b** and **Supplementary Fig.**  
249 **3c**). The number of occluded hyperplasias and DCIS-like lesions was also reduced to less than  
250 half of that observed in vehicle-treated animals. Hyperplastic lesions in control HER2+ animals  
251 showed varying degrees of luminal differentiation as assessed by the uneven levels of  
252 cytokeratin 8/18 expression (**Fig. 3c, upper panel**). The myoepithelial cells (detected as  
253 smooth muscle actin, SMA, positive), otherwise equally spaced in normal FVB animal ducts,  
254 were unevenly distributed in the vehicle-treated hyperplasias in the MMTV-HER2 mice. In  
255 contrast, HC4-treated MMTV-HER2 animals presented increased expression of cytokeratin  
256 8/18 in the luminal layer, frequently surrounding an empty lumen, and an external continuous

257 layer of myoepithelial cells (**Fig. 3c**, lower panel and graph). This data indicates that HC4  
258 treatment leads to a restored differentiation state of early HER2-driven cancer lesions.

259 We next treated animals once they displayed tumors, ranging from 30 to 200 mm<sup>3</sup>  
260 volume (two tumors were >200 mm<sup>3</sup>) for two weeks with HC4 (**Supplementary Fig. 4a**). In the  
261 vehicle treatment group, tumors grew steadily (**Fig. 4a**), reaching up to 10 times its original  
262 volume in two weeks (**Supplementary Fig. 4b**, upper graph). In contrast, HC4-treated tumors  
263 showed a reduced growth rate (**Fig. 4a**), with some tumors remaining in complete cyostasis  
264 (defined as doubling tumor volume only once in the 2-week period, 43% in HC4-treated vs 7%  
265 in controls) (**Supplementary Fig. 4b**, lower graph) and some tumors (25%) showing regression  
266 in the 2-week window treatment (**Supplementary Fig. 4c**). This led to a significant decrease  
267 in median final tumor volume (**Fig. 4b**). While the levels of proliferation (P-histone H3 IHC)  
268 were not different between vehicle- and HC4-treated tumors (**Supplementary Fig. 4d**), TUNEL  
269 staining of tumor sections showed a significant increase in the levels of DNA fragmentation  
270 present in HC4-treated animals (**Fig. 4c**). Thus, in overt primary lesions HC4 treatment induced  
271 apoptosis of established HER2+ tumors, arguing for context-dependent fitness-promoting  
272 functions of PERK during progression.

273 Treatment of human cancer cells with HER2 overexpression (MCF10A-HER2 or ZR-75-  
274 1) or HER2-amplified (SKBR3) (**Fig. 4d** and **Supplementary Fig. 4e**) with HC4 in 3D acini  
275 cultures in Matrigel showed that a 10-day treatment with vehicle or HC4 (2 μM) significantly  
276 increased levels of apoptosis (cleaved caspase-3) in these organoids, especially in the inner  
277 cell mass that is deprived from contact with the ECM (**Fig. 4d**). As in the *in vivo* conditions, we  
278 did not detect a significant change in the levels of proliferation as detected by phospho-histone  
279 H3 levels (**Supplementary Fig. 4f**). We conclude that early MMTV-HER2+ lesions require  
280 PERK for HER2-driven alterations in ductal epithelial organization. In HER2+ human cancer  
281 cells and mouse tumors HER2 is dependent on PERK for survival.

282

283 **PERK signaling is required for optimal HER2 phosphorylation, localization and AKT and**  
284 **ERK activation.**

285 We next tested the hypothesis that since HER2+ tumors are sensitive to proteotoxicity  
286 (Singh et al., 2015), inhibition of PERK might affect optimal HER2 activity due to increased ER  
287 client protein load. Detection of HER2 phosphorylation at residues Y1221/1222 in tumors  
288 showed that the area positive for P-HER2 reported by others (DiGiovanna et al., 1998)



289 overlapped with the staining for P-PERK and P-eIF2 $\alpha$  (**Fig. 5a**). This finding indicated that the  
290 activation of PERK and HER2 pathways co-localize. Similarly, single cell targeted-gene  
291 expression profiling of primary tumor cells also showed a population of primary tumor cells  
292 (around 25%) with high levels of ER stress genes expression (**Fig. 5b**), which could correspond  
293 to the ones showing P-HER2 activation. Importantly, when we scored the P-HER2 levels in the  
294 tumors, taking into account both the area and the intensity of the staining (**Supplementary Fig.**  
295 **5a**), we found that HC4-treated tumors showed significantly lower levels of P-HER2 than control  
296 animals (**Fig. 5c**). HER2 signals as a homodimer or heterodimer with EGFR and HER3  
297 (Moasser, 2007; Negro et al., 2004). *In vitro* treatment of MCF10A-HER2 cells that were  
298 starved and treated with EGF (100 ng/ml, 15 min) in the presence or absence of HC4 (2  $\mu$ M)  
299 revealed that PERK inhibition decreased both the basal and EGF-induced levels of P-EGFR  
300 and P-HER2, along with downregulation of the survival pathway P-AKT, P-S6 and P-ERK1/2  
301 levels (**Fig. 5d** and **Supplementary Fig. 5b**). No obvious effect was observed under these  
302 conditions on total HER2 levels or heterodimerization with EGFR as determined by surface  
303 biotinylation and co-immunoprecipitation studies (data not shown). Since HC4 does not have  
304 a direct inhibitory effect on the active site of any of the HER family members, AKT or S6 kinases  
305 (**Supplementary Table 4**), this effect must be due to an indirect effect of PERK inhibition on  
306 HER2 signaling. In contrast to other HER family members, HER2 is known to remain at the  
307 plasma membrane after ligand binding and dimerization (Hommelgaard et al., 2004; Bertelsen  
308 et al., 2014). We thus tested if HC4 might be disturbing the mechanism of activation of HER2  
309 receptors. To this end, we performed surface biotinylation assays to measure the presence of  
310 the receptor on the cell surface, and reversible surface biotinylation to measure receptor  
311 endocytosis (Cihil et al., 2013). Our data showed that HC4 treatment decreased the amount of  
312 P-HER2 and total HER2 in the cell surface (**Fig. 5e** and **Supplementary Fig. 5c**), while  
313 concomitantly increasing endocytosed phospho- and total HER2 (**Fig. 5f**). Our data, along with  
314 previously published data (Singh et al., 2015), allow us to suggest that PERK signaling and  
315 proper UPR function is required to maintain proper HER2 downstream signaling by affecting  
316 optimal receptor localization and activation.

317

## 318 **DISCUSSION**

319 Studies in HER2+ breast cancer models have suggested that HER2+ breast cancer  
320 tumorigenesis is dependent on PERK signaling for survival and adaptation (Bobrovnikova-  
321 Marjon et al., 2010; Singh et al., 2015). We had found that quiescent tumor cells that exist

322 within surgical margins or as dormant DCCs in target organs (Bragado et al., 2013; Chéry et  
323 al., 2014; Sosa et al., 2014; Sosa et al., 2015) enhance their survival via PERK signaling as  
324 well as other ER stress pathways (Adomako et al., 2015; Ranganathan et al., 2008;  
325 Ranganathan et al., 2006; Schewe and Aguirre-Ghiso, 2008; Schewe and Aguirre-Ghiso,  
326 2009). Recently, Pommier et al. validated this in their studies demonstrating that pancreatic  
327 DCCs lodged in the liver also activate a UPR during quiescence. This level of concordance  
328 across a variety of tumor types and models supports the requisite nature of this stress  
329 adaptation biology across the cancer landscape.

330 We now show that pharmacological PERK inhibition can selectively target HER2+ DCCs  
331 and primary lesions. A salient finding to discuss is the inhibitory effect of PERK inhibition on  
332 metastasis. In the MMTV-HER2 model, like in patients, metastases can be asynchronous with  
333 the primary tumor and sometimes develop even in instances of occult primary lesions, wherein  
334 metastases are identified earlier than the primary tumor (Husemann et al., 2008; Pavlidis and  
335 Fizazi, 2005). PERK inhibition reduced metastasis independent of the primary tumor  
336 development timeline including those initiated early (before overt tumors were palpable) as well  
337 as metastases that were coincident with overt primary tumor growth. This is important because  
338 it argues that the effect on metastasis was not simply due to reduced primary tumor burden  
339 caused by HC4. Surprisingly, metastatic burden was reduced by HC4 treatment via eliminating  
340 non-proliferative solitary or small clusters of P-Rb-negative DTCs. Imaging and single cell  
341 multiplex qPCR robustly reveal that these DCCs show an upregulation of GADD34 (protein)  
342 and a larger set of ER stress genes, including PERK itself, while also expressing genes  
343 representative of the quiescent phenotype as revealed by upregulation of several negative  
344 regulators of cell proliferation. It should be taken into account that part of the PERK-induced  
345 ER stress response is transcriptional in nature while also having a key component of  
346 preferential translation of upstream ORF-containing genes, such as ATF4 and GADD34  
347 (Young and Wek, 2016). Similarly, UPR-induced G1 arrest has been shown to be caused by  
348 inhibiting the translation of cyclin D1 (Brewer et al., 1999). Our data strengthen the argument  
349 that quiescent DCCs are more likely to rely on PERK signaling for survival. Similarly, a sub-  
350 population of human metastatic cells from breast cancer patients also showed a negative  
351 correlation between GADD34 and Ki67, supportive of this association seen in this study in  
352 mouse models. Our data suggest that along with NR2F1 (Borgen et al.), GADD34 alone or in  
353 combination with NR2F1 may serve as a robust biomarker set for dormant/UPR<sup>high</sup> DCCs and

354 thus guide patient selection for treatment. An open question is related to the identification of  
355 the source of PERK activation in quiescent DCCs, which remains unknown.

356 We also demonstrate that cytostatic therapies such as CDK4/6 inhibitors (Abemaciclib)  
357 not only decrease proliferation substantially, but at the same time result in concomitant  
358 activation of the UPR as shown by high GADD34 levels in primary tumor and metastases. This  
359 observation would support the possibility of combining such CDK4/6 targeting therapies with  
360 PERK inhibitors to have an even more profound control of both proliferating and non-  
361 proliferating cancer cells. Encouragingly, the doses of HC4 we used did not significantly affect  
362 glucose levels, bone marrow or peripheral blood cell counts, drinking and feeding behavior of  
363 non-tumor or cancer bearing mice. Additional analysis revealed that HC4 treatment did not  
364 specifically alter the frequency of various innate and adaptive immune cell types (not shown),  
365 arguing that the effects we detect of HC4 on HER2 breast tumors in mice is mainly dependent  
366 on the targeting of cancer cell intrinsic pathways. Collectively these data support the dose  
367 range evaluated in which we illustrate that a significant blockade of tumor growth and  
368 metastasis is possible through the elimination of dormant DTCs and that this PERK inhibitor  
369 does not adversely affect the host's normal organ function.

370 The exact mechanisms by which PERK kinase inhibition blocks tumor cell survival are  
371 unclear. It is possible that reduced adaptation to stress imposed by proteotoxicity in cancer  
372 cells (Singh et al., 2015) is a mechanism. Our data also revealed that HC4 reduced phospho-  
373 HER2 levels *in vivo* and decreased the abundance of active receptor in the membrane through  
374 enhanced endocytosis, but we did not see changes in HER2 protein degradation. However, it  
375 is still unclear how exactly PERK controls HER2 membrane localization or endocytosis. It is  
376 possible that internalization allows for better or faster de-phosphorylation of the receptor or  
377 decreases the chances of it being activated; hence resulting in decreased downstream  
378 signaling. This possibility is supported by the finding that shows that receptor endocytosis can  
379 reduce the signaling output of many plasma membrane receptors by physically reducing the  
380 concentration of the receptors at the cell surface (Sorkin et al, 2009).

381 In early lesions, our work also revealed that HC4 induced a differentiation phenotype.  
382 However, in established tumors, HC4 used as a single agent pushed tumors into stasis or  
383 regression via apoptosis. This argues that PERK signaling deregulation of HER2+ in early  
384 lesions is more likely linked to loss of differentiation programs, though these mechanisms have  
385 yet to be determined. Then, as the biology of the tumor progresses to become highly

386 proliferative, the dependency on PERK signaling remains highly reliant for these HER2+  
387 tumors.

388 Discovering a target and drug that can eradicate dormant DCCs is highly significant  
389 because dormant DCCs are known to evade anti-proliferative therapies *via* active and passive  
390 mechanisms (Aguirre-Ghiso et al., 2013; Naumov et al., 2003; Oshimori et al., 2015). Our work  
391 opens the door to the use of anti-dormant DTC survival therapies as a new way to target  
392 metastatic disease. This would allow targeting the full phenotypic heterogeneity of  
393 disseminated disease that may include proliferative, slow-cycling, and dormant DTCs (Aguirre-  
394 Ghiso et al., 2013). The eradication of DCCs in the bone marrow, where these cells also  
395 commonly reside in a dormant state (Bragado et al., 2013; Chéry et al., 2014; Ghajar et al.,  
396 2013; Husemann et al., 2008; Nobre et al., 2020), further strengthens the notion of PERK  
397 inhibition as an anti-dormant DCC therapy (Aguirre-Ghiso et al., 2013) that may be used in the  
398 adjuvant setting to eliminate dormant minimal residual disease (Aguirre-Ghiso et al., 2013).

399

## 400 **MATERIALS AND METHODS**

401

402 **Reagents.** EGF was obtained from PeproTech and used at 100 ng/ml. Thapsigargin was from  
403 Sigma and used at 2 nM or 0.2  $\mu$ M as indicated in the legends. HC4 and Abemaciclib were  
404 provided by HiberCell and Eli Lilly, respectively.

405

406 **Cell culture.** For 3D cultures, MCF10A-HER2, SKBR3 and ZR-75-1 cells were plated in growth  
407 factor-reduced Matrigel (Corning) and grown as described previously (Avivar-Valderas et al.,  
408 2013). Treatments with vehicle (DMSO) or HC4 (2  $\mu$ M) were replaced every 24 h for 2D and  
409 every 48 h for 3D cultures.

410

411 **Animal work and tissue processing.** Institutional Animal Care and Use Committees (IACUC)  
412 at Mount Sinai School of Medicine (MSSM) approved all animal studies. Protocol number: 08-  
413 0417. The FVB/N-Tg (MMTVneu) mouse strain was obtained from Jackson Laboratories.  
414 These mice express the un-activated neu (HER2) form under the transcriptional control of the  
415 mouse mammary tumor virus promoter/enhancer. Before being used in any experiment,  
416 females underwent one round of pregnancy and at least two weeks of no lactation after  
417 weaning. Females between 24-32 weeks of age were injected intraperitoneally with vehicle  
418 (90% corn oil, 10% ethanol) or HC4 (50 mpk) daily, for two weeks. For the combination

419 treatment, females 24-32 weeks of age were treated daily by oral gavage with Abemaciclib (50  
420 mpk) for 4 weeks before starting the treatment described earlier with HC4. Tumor volumes  
421 were measured using the formula  $(D \times d^2)/2$ , where D is the longest and d is the shortest  
422 diameter. For circulating tumor cell (CTC) count, animals were anesthetized and whole blood  
423 was extracted by cardiac puncture. Mammary glands, tumors and lungs were collected and  
424 fixed in 10% buffered formalin overnight before paraffin embedding. The bone marrow from the  
425 two lower limbs was flushed with a 26 G needle and further processed by Ficoll density gradient  
426 centrifugation. For CTC as well as for disseminated tumor cell (DTC) detection in bone marrow,  
427 tissues were depleted of mature hematopoietic cells by anti-mouse antibody-labeled magnetic  
428 bead separation (Miltenyi Biotec) before fixation in formalin for 20 min at 4 °C.

429

430 **Mammary gland whole mount staining.** Mammary glands fixed in 10% buffered formalin  
431 were incubated in Carmine Alum stain (Carmine 0.2%, Aluminum potassium sulfate 0.5%)  
432 (Sigma) for 2 days. Then, they were dehydrated and transfer to methyl salicylate solution before  
433 imaging using a stereomicroscope.

434

435 **Immunohistochemistry and immunofluorescence.** Immunohistochemistry (IHC) and  
436 immunofluorescence (IF) from paraffin-embedded sections was performed as previously  
437 described (Avivar-Valderas et al., 2013). Briefly, slides were dewaxed and serially rehydrated.  
438 Heat-induced antigen retrieval was performed in either citrate buffer (10 mM, pH6), EDTA  
439 buffer (1 mM, pH 8) or Tris/EDTA (pH 9). Slides were further permeabilized in 0.1% Triton-  
440 X100, blocked and incubated with primary antibody overnight at 4 °C at 1:50-1:200 dilution.  
441 For IHC, an additional step of endogenous peroxidase and avidin/biotin quenching was  
442 performed before primary antibody incubation. Primary antibodies used were anti-cytokeratin  
443 8/18 (Progen), smooth muscle actin-Cy3 (Sigma), P-PERK (T980) (provided by Eli Lilly,  
444 Tenkerian et al., 2015), P-EIF2A, Cleaved Caspase 3, P-H3 (S10) and P-HER2 (Y1221/1222)  
445 (Cell signaling), P-Rb (S249/T252) (Santa Cruz), HER2 (Abcam) and HER2 (Millipore), Ki67  
446 (eBioscience), cytokeratin cocktail (C11 and ck7, Abcam; AE1 and AE3, Millipore) and  
447 GADD34 (Santa Cruz). Next, slides were incubated in secondary antibodies (Life  
448 Technologies) and mounted. For IHC, sections were processed using VectaStain ABC Elite  
449 kit (Vector Laboratories) and DAB Substrate kit for peroxidase labelling (Vector Laboratories)  
450 and mounted in VectaMount medium (Vector laboratories). For IF, sections were mounted in  
451 ProLong Gold Antifade aqueous medium (Thermo Fisher).



452 In the case of immunocytofluorescence, cytopspins of fixed cells (100,00-200,000 cells/cytospin)  
453 were prepared by cyto-centrifugation at 500 rpm for 3 min on poly-prep slides, and the staining  
454 protocol was performed as explained below from the permeabilization onward.

455 For the staining of 3D cultures, acini were fixed in 4% PFA for 20 min at 4C, permeabilized with  
456 0.5% Triton-X100 in PBS for 20 min at room temperature, washed in PBS-glycine and then  
457 blocked with 10% normal goat serum for 1h at 37 °C, before performing immunofluorescence  
458 staining. The scoring for P-HER2 levels is explained in Supplementary Fig.3. For the scoring  
459 of CK8/18 and SMA in mammary gland ducts, 20 low magnification fields/animal were  
460 evaluated for the expression of CK8/18 as negative (0), low (1) or high (2) and the same for  
461 SMA and the sum of the two scores was considered as the final score (from 0 to 4).

462

463 **Microscopy.** Images were captured by using a Nikon Eclipse TS100 microscope, a Leica  
464 DM5500 or Leica SP5 confocal microscope.

465

466 **TUNEL *in situ* cell death detection.** Apoptosis levels were evaluated using the *In situ* Cell  
467 Death Detection kit, AP (Roche). Paraffin sections from tumors were dewaxed, rehydrated and  
468 permeabilized in phosphate buffered saline (PBS) 0.2% Triton-X100 for 8 minutes. Then,  
469 slides were washed and blocked in 20% normal goat serum for 1h at 37C. The TUNEL reaction  
470 mixture was then added and let go for 1h at 37 °C. The reaction was stopped by incubating  
471 with Buffer I (0.3 M Sodium chloride, 30 mM Sodium citrate). Next, the slides were incubated  
472 with anti-fluorescein-AP antibody for 30 min. at 37 °C. After three washes in Tris buffered  
473 saline (TBS), slides were incubated in alkaline phosphatase substrate in 0.1% Tween-20 for  
474 20 min. at room temperature. Finally, the slides were mounted using aqueous mounting  
475 medium. The percentage of TUNEL positive cells was calculated using Image J software (NIH).

476

477 **Immunoblot analysis.** Cells were lysed in RIPA buffer and protein analyzed by  
478 immunoblotting as described previously (Ranganathan et al., 2006). Membranes were blotted  
479 using the additional following antibodies: P-PERK (T980) (Tenkerian et al., 2015), PERK  
480 (Santa Cruz), P-EGFR (Y1148), EGFR, P-AKT (S473), P-S6 (S235/236), P-ERK (Y204), P-  
481 HER2 (Y1221/1222, Y1112, Y877), HSP90 (Cell signaling), GAPDH (Millipore) and  $\beta$ -Tubulin  
482 (Abcam). For induction of ER stress, MCF10A-HER2 cells were plated in low adhesion plates  
483 for 24h before collection.

484

485 **Cell surface biotinylation and endocytosis assay.** For cell surface biotinylation, we used  
486 Pierce cell surface protein isolation kit following manufacturer's instructions with minor  
487 changes. Briefly, MCF10A-HER2 cells were serum- and EGF-starved and treated +/- HC4 for  
488 24h before being stimulated with +/- EGF (100 ng/ml) for 20'. Then, cells were washed with  
489 ice-cold PBS and surface proteins biotinylated for 30 min at 4C. After quenching, cells were  
490 harvested and lysed using RIPA buffer. Protein lysates were incubated with NeutrAvidin  
491 agarose beads and the bound proteins were released by incubation with SDS-PAGE sample  
492 buffer containing DTT (50 mM). For endocytosis assays (Cihil et al., 2013), cells were treated  
493 similarly but before treatment with EGF cell surface proteins were biotinylated. After 20 min  
494 incubation +/- EGF (100 ng/ml) at 37C (to induce endocytosis), cells were washed with ice-cold  
495 PBS and incubated with stripping buffer (to remove cell surface biotinylation: 75 mM NaCl,  
496 1mM MgCl<sub>2</sub>, 0.1mM CaCl<sub>2</sub>, 50 mM glutathione and 80 mM NaOH, pH 8.6) for 30'. To control  
497 for stripping efficiency, cells were stripped without 37C incubation (t=0). Cell lysates were  
498 prepared and processed for biotinylated protein isolation as described before.

499

500 **Single cell targeted gene expression analysis.** Primary tumors from MMTV-neu 28-30-week  
501 old females were digested with collagenase into a single cell suspension. Lungs from MMTV-  
502 neu 24-30-week old females were digested into a single cell suspension with collagenase and  
503 resuspended in FACS buffer. Cells were then stained with anti-HER2-PE, anti-CD45-APC and  
504 DAPI and the HER2+/CD45- population of cells sorted using a BDFACSAria sorter as  
505 previously described (Aguirre-Ghiso et al., 2021). Sorted cells were resuspended at a  
506 312,500cells/ml concentration in media and 80 ul were mixed with 20 ul suspension reagent  
507 (C1 Fluidigm). A C1 Single-cell Preamp IFC 10-17 um was used for the single cell separation.  
508 Pre-amplification was run using Ambion Single Cell-to-CT qRT-PCR kit and 20x TaqMan Gene  
509 expression FAM-MGB assays. Resulting cDNA was further diluted in C1 DNA dilution reagent  
510 1/3 and used for gene expression analysis using 96.96 IFCs (Fluidigm), Juno System controller  
511 and Biomark HD for high-throughput qPCR. TaqMan Fast Advanced Master Mix was used for  
512 the qPCR reactions. Analysis was performed using Fluidigm Real-Time PCR Analysis Software  
513 and Clustergrammer web-based tool (Fernandez *et al.*, 2017) for hierarchical clustering  
514 heatmaps.

515

516 **Database:** TCGA data on mRNA expression levels of EIF2AK3 was accessed and analyzed  
517 through cBioPortal (<https://bit.ly/3yBhw2b>).

518 **Statistical analysis.** All points represent independent biological samples with error bars  
519 representing standard deviations and statistical significance was determined using one-sided  
520 Mann–Whitney test using the Graph Pad Prism Software.

521

522 **ACKNOWLEDGEMENTS:** We thank the Aguirre-Ghiso and HiberCell teams for useful  
523 discussions. We thank Brian Lee for help with Clustergrammer use. Grant Support: Eli Lilly to  
524 J.A.A-G, LIFA Fellowship (Eli Lilly) to V.C., NIH/NCI (CA109182, CA196521, CA216248), to  
525 J.A.A-G, HiberCell and DoD-BCRP Breakthrough Award (BC132674) to J.A.A-G. JA.A-G is a  
526 Samuel Waxman Cancer Research Foundation Investigator.

527

## 528 **AUTHOR CONTRIBUTIONS**

529 VC and WZ designed, planned and conducted experiments, analyzed data, and wrote the  
530 manuscript; VC, EFF, WZ, ARN, JC performed *in vivo* mouse experiments. WZ and VC  
531 performed immune profiling experiments and pharmacokinetic studies. KS, AN, MM and ACR  
532 designed, developed and directed all pharmacology related to PERK inhibitors and participated  
533 in experimental design and analyzed data; JAAG conceived the project and designed  
534 experiments. VC, WZ, MM, ACR and JAAG analyzed data, provided insight, wrote and edited  
535 the manuscript.

536

## 537 **DECLARATION OF INTERESTS**

538 JAG is a scientific co-founder of, scientific advisory board member and equity owner in  
539 HiberCell and receives financial compensation as a consultant for HiberCell, a Mount Sinai  
540 spin-off company focused on therapeutics that prevent or delay cancer recurrence. VC, EFF,  
541 AN, MM and ACR are HiberCell employees.

542

## 543 **REFERENCES**

544 Adomako, A., Calvo, V., Biran, N., Osman, K., Chari, A., Paton, J. C., Paton, A. W., Moore,  
545 K., Schewe, D. M., and Aguirre-Ghiso, J. A. (2015). Identification of markers that functionally  
546 define a quiescent multiple myeloma cell sub-population surviving bortezomib treatment.  
547 *BMC Cancer* 15, 444.



548 Aguirre-Ghiso, J. A., Bragado, P., and Sosa, M. S. (2013). Metastasis awakening: targeting  
549 dormant cancer. *Nat Med* 19, 276-277.

550 Avivar-Valderas, A., Bobrovnikova-Marjon, E., Alan Diehl, J., Bardeesy, N., Debnath, J., and  
551 Aguirre-Ghiso, J. A. (2013). Regulation of autophagy during ECM detachment is linked to a  
552 selective inhibition of mTORC1 by PERK. *Oncogene*.

553 Avivar-Valderas, A., Salas, E., Bobrovnikova-Marjon, E., Diehl, J. A., Nagi, C., Debnath, J.,  
554 and Aguirre-Ghiso, J. A. (2011). PERK integrates autophagy and oxidative stress responses  
555 to promote survival during extracellular matrix detachment. *Mol Cell Biol* 31, 3616-3629.

556 Bi, M., Naczki, C., Koritzinsky, M., Fels, D., Blais, J., Hu, N., Harding, H., Novoa, I., Varia, M.,  
557 Raleigh, J., *et al.* (2005). ER stress-regulated translation increases tolerance to extreme  
558 hypoxia and promotes tumor growth. *Embo J* 24, 3470-3481.

559 Blais, J. D., Filipenko, V., Bi, M., Harding, H. P., Ron, D., Koumenis, C., Wouters, B. G., and  
560 Bell, J. C. (2004). Activating transcription factor 4 is translationally regulated by hypoxic  
561 stress. *Mol Cell Biol* 24, 7469-7482.

562 Bobrovnikova-Marjon, E., Grigoriadou, C., Pytel, D., Zhang, F., Ye, J., Koumenis, C.,  
563 Cavener, D., and Diehl, J. A. PERK promotes cancer cell proliferation and tumor growth by  
564 limiting oxidative DNA damage. *Oncogene* 29, 3881-3895.

565 Bobrovnikova-Marjon, E., Grigoriadou, C., Pytel, D., Zhang, F., Ye, J., Koumenis, C.,  
566 Cavener, D., and Diehl, J. A. (2010). PERK promotes cancer cell proliferation and tumor  
567 growth by limiting oxidative DNA damage. *Oncogene* 29, 3881-3895.

568 Bobrovnikova-Marjon, E., Hatzivassiliou, G., Grigoriadou, C., Romero, M., Cavener, D. R.,  
569 Thompson, C. B., and Diehl, J. A. (2008). PERK-dependent regulation of lipogenesis during  
570 mouse mammary gland development and adipocyte differentiation. *Proc Natl Acad Sci U S A*  
571 105, 16314-16319.

572 Bragado, P., Estrada, Y., Parikh, F., Krause, S., Capobianco, C., Farina, H. G., Schewe, D.  
573 M., and Aguirre-Ghiso, J. A. (2013). TGF-beta2 dictates disseminated tumour cell fate in  
574 target organs through TGF-beta-RIII and p38alpha/beta signalling. *Nat Cell Biol* 15, 1351-  
575 1361.

576 Cerami, E., Gao, J., Dogrusoz, U., Gross, B. E., Sumer, S. O., Aksoy, B. A., Jacobsen, A.,  
577 Byrne, C. J., Heuer, M. L., Larsson, E., *et al.* (2012). The cBio cancer genomics portal: an  
578 open platform for exploring multidimensional cancer genomics data. *Cancer discovery* 2, 401-  
579 404.

580 Chen, X., Iliopoulos, D., Zhang, Q., Tang, Q., Greenblatt, M. B., Hatziapostolou, M., Lim, E.,  
581 Tam, W. L., Ni, M., Chen, Y., *et al.* (2014). XBP1 promotes triple-negative breast cancer by  
582 controlling the HIF1alpha pathway. *Nature* 508, 103-107.

583 Chéry, L., Lam, H.-M., Coleman, I., Lakely, B., Coleman, R., Larson, S., Aguirre-Ghiso, J. A.,  
584 Xia, J., Gulati, R., Nelson, P. S., *et al.* (2014). Characterization of single disseminated  
585 prostate cancer cells reveals tumor cell heterogeneity and identifies dormancy associated  
586 pathways).

587 Chevet, E., Hetz, C., and Samali, A. (2015). Endoplasmic reticulum stress-activated cell  
588 reprogramming in oncogenesis. *Cancer Discov* 5, 586-597.

589 DiGiovanna, M. P., Lerman, M. A., Coffey, R. J., Muller, W. J., Cardiff, R. D., and Stern, D. F.  
590 (1998). Active signaling by Neu in transgenic mice. *Oncogene* 17, 1877-1884.

591 Espina, V., Mariani, B. D., Gallagher, R. I., Tran, K., Banks, S., Wiedemann, J., Huryk, H.,  
592 Mueller, C., Adamo, L., Deng, J., *et al.* (2010). Malignant precursor cells pre-exist in human  
593 breast DCIS and require autophagy for survival. *PloS one* 5, e10240.

594 Ghajar, C. M., Peinado, H., Mori, H., Matei, I. R., Evason, K. J., Brazier, H., Almeida, D.,  
595 Koller, A., Hajjar, K. A., Stainier, D. Y., *et al.* (2013). The perivascular niche regulates breast  
596 tumour dormancy. *Nat Cell Biol* 15, 807-817.

597 Guy, C. T., Webster, M. A., Schaller, M., Parsons, T. J., Cardiff, R. D., and Muller, W. J.  
598 (1992). Expression of the neu protooncogene in the mammary epithelium of transgenic mice  
599 induces metastatic disease. *Proc Natl Acad Sci U S A* 89, 10578-10582.

600 Harper, K. L., Sosa, M. S., Entenberg, D., Hosseini, H., Cheung, J. F., Nobre, R., Avivar-  
601 Valderas, A., Nagi, C., Girnius, N., Davis, R. J., *et al.* (2016). Mechanism of early  
602 dissemination and metastasis in Her2(+) mammary cancer. *Nature* 540, 588-592.

603 Hart, L. S., Cunningham, J. T., Datta, T., Dey, S., Tameire, F., Lehman, S. L., Qiu, B., Zhang,  
604 H., Cerniglia, G., Bi, M., *et al.* (2012). ER stress-mediated autophagy promotes Myc-  
605 dependent transformation and tumor growth. *J Clin Invest* 122, 4621-4634.

606 Husemann, Y., Geigl, J. B., Schubert, F., Musiani, P., Meyer, M., Burghart, E., Forni, G., Eils,  
607 R., Fehm, T., Riethmuller, G., and Klein, C. A. (2008). Systemic spread is an early step in  
608 breast cancer. *Cancer Cell* 13, 58-68.

609 Lu, Y., Bertran, S., Samuels, T. A., Mira-y-Lopez, R., and Farias, E. F. (2010). Mechanism of  
610 inhibition of MMTV-neu and MMTV-wnt1 induced mammary oncogenesis by RARalpha  
611 agonist AM580. *Oncogene* 29, 3665-3676.

- 612 Moasser, M. M. (2007). The oncogene HER2: its signaling and transforming functions and its  
613 role in human cancer pathogenesis. *Oncogene* 26, 6469-6487.
- 614 Muller, W. J., Sinn, E., Pattengale, P. K., Wallace, R., and Leder, P. (1988). Single-step  
615 induction of mammary adenocarcinoma in transgenic mice bearing the activated c-neu  
616 oncogene. *Cell* 54, 105-115.
- 617 Naumov, G. N., Townson, J. L., MacDonald, I. C., Wilson, S. M., Bramwell, V. H., Groom, A.  
618 C., and Chambers, A. F. (2003). Ineffectiveness of doxorubicin treatment on solitary dormant  
619 mammary carcinoma cells or late-developing metastases. *Breast Cancer Res Treat* 82, 199-  
620 206.
- 621 Negro, A., Brar, B. K., and Lee, K. F. (2004). Essential roles of Her2/erbB2 in cardiac  
622 development and function. *Recent progress in hormone research* 59, 1-12.
- 623 Nobre, A.R., Dalla, E., Yang, J., Huang, X., Kenigsberg, E., Wang, J. and Aguirre-Ghiso,  
624 J.(2021). A Mesenchymal-like Program of Dormancy controlled by ZFP281 Serves as a  
625 Barrier To Metastatic Progression of Early Disseminated Cancer Cells.
- 626 Nobre, A. R., Risson, E., Singh, D. K., Di Martino, J., Cheung, J. F., Wang, J., Johnson, J.,  
627 Russnes, H. G., Bravo-Cordero, J. J., Birbrair, A., *et al.* (2020). NG2+/Nestin+ mesenchymal  
628 stem cells dictate DTC dormancy in the bone marrow through TGF $\beta$ 2. *bioRxiv Online*,  
629 2020.2010.2022.349514.
- 630 Oshimori, N., Oristian, D., and Fuchs, E. (2015). TGF-beta promotes heterogeneity and drug  
631 resistance in squamous cell carcinoma. *Cell* 160, 963-976.
- 632 Ozcan, U., Ozcan, L., Yilmaz, E., Duvel, K., Sahin, M., Manning, B. D., and Hotamisligil, G. S.  
633 (2008). Loss of the tuberous sclerosis complex tumor suppressors triggers the unfolded  
634 protein response to regulate insulin signaling and apoptosis. *Mol Cell* 29, 541-551.
- 635 Pavlidis, N., and Fizazi, K. (2005). Cancer of unknown primary (CUP). *Crit Rev Oncol*  
636 *Hematol* 54, 243-250.
- 637 Ranganathan, A. C., Ojha, S., Kourtidis, A., Conklin, D. S., and Aguirre-Ghiso, J. A. (2008).  
638 Dual function of pancreatic endoplasmic reticulum kinase in tumor cell growth arrest and  
639 survival. *Cancer Res* 68, 3260-3268.
- 640 Ranganathan, A. C., Zhang, L., Adam, A. P., and Aguirre-Ghiso, J. A. (2006). Functional  
641 coupling of p38-induced up-regulation of BiP and activation of RNA-dependent protein  
642 kinase-like endoplasmic reticulum kinase to drug resistance of dormant carcinoma cells.  
643 *Cancer Res* 66, 1702-1711.

644 Romero-Ramirez, L., Cao, H., Regalado, M. P., Kambham, N., Siemann, D., Kim, J. J., Le, Q.  
645 T., and Koong, A. C. (2009). X box-binding protein 1 regulates angiogenesis in human  
646 pancreatic adenocarcinomas. *Transl Oncol* 2, 31-38.

647 Rouschop, K. M., van den Beucken, T., Dubois, L., Niessen, H., Bussink, J., Savelkoul, K.,  
648 Keulers, T., Mujcic, H., Landuyt, W., Voncken, J. W., *et al.* (2010). The unfolded protein  
649 response protects human tumor cells during hypoxia through regulation of the autophagy  
650 genes MAP1LC3B and ATG5. *J Clin Invest* 120, 127-141.

651 Schewe, D. M., and Aguirre-Ghiso, J. A. (2008). ATF6alpha-Rheb-mTOR signaling promotes  
652 survival of dormant tumor cells in vivo. *Proc Natl Acad Sci U S A* 105, 10519-10524.

653 Schewe, D. M., and Aguirre-Ghiso, J. A. (2009). Inhibition of eIF2alpha dephosphorylation  
654 maximizes bortezomib efficiency and eliminates quiescent multiple myeloma cells surviving  
655 proteasome inhibitor therapy. *Cancer Res* 69, 1545-1552.

656 Singh, N., Joshi, R., and Komurov, K. (2015). HER2-mTOR signaling-driven breast cancer  
657 cells require ER-associated degradation to survive. *Sci Signal* 8, ra52.

658 Sosa, M. S., Bragado, P., and Aguirre-Ghiso, J. A. (2014). Mechanisms of disseminated  
659 cancer cell dormancy: an awakening field. *Nat Rev Cancer* 14, 611-622.

660 Sosa, M. S., Parikh, F., Maia, A. G., Estrada, Y., Bosch, A., Bragado, P., Ekpin, E., George,  
661 A., Zheng, Y., Lam, H. M., *et al.* (2015). NR2F1 controls tumour cell dormancy via SOX9- and  
662 RARbeta-driven quiescence programmes. *Nat Commun* 6, 6170.

663 Tameire, F., Verginadis, II, and Koumenis, C. (2015). Cell intrinsic and extrinsic activators of  
664 the unfolded protein response in cancer: Mechanisms and targets for therapy. *Semin Cancer*  
665 *Biol* 33, 3-15.

666 Tenkerian, C., Krishnamoorthy, J., Mounir, Z., Kazimierczak, U., Khoutorsky, A., Staschke, K.  
667 A., Kristof, A. S., Wang, S., Hatzoglou, M., and Koromilas, A. E. (2015). mTORC2 Balances  
668 AKT Activation and eIF2alpha Serine 51 Phosphorylation to Promote Survival under Stress.  
669 *Mol Cancer Res* 13, 1377-1388.

670 Walter, P., and Ron, D. (2011). The unfolded protein response: from stress pathway to  
671 homeostatic regulation. *Science* 334, 1081-1086.

672 Ye, J., Kumanova, M., Hart, L. S., Sloane, K., Zhang, H., De Panis, D. N., Bobrovnikova-  
673 Marjon, E., Diehl, J. A., Ron, D., and Koumenis, C. The GCN2-ATF4 pathway is critical for  
674 tumour cell survival and proliferation in response to nutrient deprivation. *Embo J* 29, 2082-  
675 2096.

676 Yu, Q., Zhao, B., Gui, J., Katlinski, K. V., Brice, A., Gao, Y., Li, C., Kushner, J. A., Koumenis,  
677 C., Diehl, J. A., and Fuchs, S. Y. (2015). Type I interferons mediate pancreatic toxicities of  
678 PERK inhibition. *Proc Natl Acad Sci U S A* 112, 15420-15425.

679

## 680 **Figure legends**

681 **Figure 1. Quiescent disseminated HER2+ cells display high levels of ER stress PERK**  
682 **pathway activation.** (a) Lung sections of MMTV-HER2 animals were stained for HER2, Ki67  
683 (proliferation marker) and GADD34 (ER stress marker). The cells/met positive for either marker  
684 was quantified and shown as percentage of total cells (N=13). (b) Human breast cancer  
685 metastases from different locations (lymph node, liver, lung) were stained for cytokeratins, Ki67  
686 (proliferation) and GADD34 (ER stress). The cells/met positive for either marker was quantified  
687 and shown as percentage of total cells (N=10). (c) Hierarchical clustering of the high-throughput  
688 targeted-gene expression (columns) profile of single cells (lung DTCs) (rows). Blue box,  
689 dormancy genes; brown box, cell cycle up genes; pink box, cell cycle down genes; green box,  
690 ER stress genes; black box, EIF2AK3 (PERK) gene. (d) Fluorescence IHC of tumor sections  
691 and lung sections from MMTV-HER2 females treated with Abemaciclib (50 mpk, 4 weeks) for  
692 HER2, Ki67 (proliferation) and GADD34 (ER stress). Scale bars, 100  $\mu$ m.

693

694 **Figure 2. HC4 PERK inhibition decreases metastatic disease in lungs and bone marrow**  
695 **at the single disseminated cancer cell level.** (a) MMTV-HER2+ females (24-week-old) were  
696 injected daily with vehicle or HC4 (50 mpk) for 2 weeks. Immunohistochemistry (IHC) of  
697 pancreas and mammary gland sections with antibodies to P-PERK and P-EIF2 $\alpha$ . Inserts show  
698 higher magnifications. Scale bars, 100  $\mu$ m. (b) Macro-metastases (>100 cells) were detected  
699 by H&E staining and quantified in 5 lung sections/animal (N=16). Scale bar, 100  $\mu$ m. P by  
700 Mann-Whitney test. (c) Micro-metastases (2-100 cells) were detected by IHC staining using an  
701 anti-HER2 antibody and quantified per lung section/animal  $\pm$  s.d. (N=6). Scale bar, 25  $\mu$ m. P  
702 by Mann-Whitney test. (d) Solitary disseminated cancer cells (DCCs) were detected by IHC  
703 staining for HER2, classified as P-Rb+ or P-Rb- and quantified per lung section  $\pm$  s.d. (N=6).  
704 Scale bar, 25  $\mu$ m. P by Mann-Whitney test. (e) Disseminated cancer cells in bone marrow were  
705 detected by IF staining for CK8/18 and HER2 in cytopspins from mature hematopoietic cell-  
706 depleted bone marrow tissue (N=8). Scale bar, 25  $\mu$ m. P by Mann-Whitney test.

707

708 **Figure 3. The PERK inhibitor HC4 causes mammary gland “normalization” in the MMTV-**  
709 **HER2+ breast cancer model.** (a) Representative images of carmine staining of whole mount  
710 mammary glands and H&E-stained mammary gland sections from vehicle- and HC4-treated  
711 animals. Scale bar, 100  $\mu$ m (b) Quantification of histological structures (empty duct e.d.,  
712 occluded duct o.d., occluded hyperplasia o.h. and DCIS-like mammary intraepithelial neoplasia  
713 M.I.N) present in H&E-stained mammary gland sections (N=50/animal, animals N=13) found  
714 in vehicle- and HC4-treated animals  $\pm$  s.e.m. Statistical significance (p) calculated by Mann-  
715 Whitney test. (c) IHC for epithelial luminal marker cytokeratin 8/18 (CK8/18) and myoepithelial  
716 marker Smooth Muscle actin (SMA) in mammary gland sections. Score for CK8/18+ and SMA+  
717 structures per animal, N=12. P by Mann-Whitney test. Scale bar, 75  $\mu$ m.

718  
719 **Figure 4. PERK inhibition impairs tumor growth in MMTV-HER2+ females.** (a) MMTV-neu  
720 females (24- to 32-week-old) presenting overt tumors were injected daily with vehicle or HC4  
721 (50 mpk) for 2 weeks. Percentage variation of tumor size in vehicle- and HC4-treated animals  
722  $\pm$  s.d. (N=16). P by Mann-Whitney test. (b) Final tumor volume (mm<sup>3</sup>). The whiskers represent  
723 the min and max of the data (N=16). P by Mann-Whitney test. (c) Representative IHC of TUNEL  
724 staining to measure apoptosis levels in tumor sections. Scale bars, 10 and 50  $\mu$ m. Graph,  
725 percentage TUNEL positive cells in vehicle- and HC4-treated tumor sections (N=5). P by Mann-  
726 Whitney test. (d) HER2+ MCF10A-HER2 or SKBR3 cells were seeded on Matrigel and after  
727 acinus establishment (day 4) wells were treated with vehicle (control) or HC4 (2  $\mu$ M) for 10  
728 days. Percentage of cleaved caspase-3 positive cells per acini (N=20)  $\pm$  s.d. P by Student's t  
729 test. Representative confocal images of MCF10A-HER2 acini stained for cleaved caspase-3.

730  
731 **Figure 5. HC4 treatment decreases the levels of phospho-HER2 and downstream**  
732 **signaling pathways.** (a) Representative images of IHC for P-HER2, P-PERK and P-EIF2 $\alpha$  in  
733 a MMTV-HER2 breast tumor section. Note that the rim positive for P-HER2 overlaps with P-  
734 PERK and P-EIF2 $\alpha$  stainings. Scale bar, 100  $\mu$ m. (b) Hierarchical clustering of the high-  
735 throughput targeted-gene expression (columns) profile of single cells (primary breast tumor)  
736 (rows) from MMTV-HER2 females. Blue box, dormancy genes; brown box, cell cycle up genes;  
737 pink box, cell cycle down genes; green box, ER stress genes; black box, EIF2AK3 (PERK)  
738 gene. (c) Representative P-HER2 and total HER2 IHC staining in vehicle- and HC4-treated  
739 breast tumors. Quantification of P-HER2 levels in tumor sections, by IHC intensity and area  
740 scoring (N=11) (See **Supplementary Fig.5a**). Scale bar, 50  $\mu$ m. P by Mann-Whitney test. (d)



741 MCF10A-HER2 cells were starved o/n and treated +/-HC4 (2  $\mu$ M), after which +/-EGF (100  
742 ng/ml) was added for 15 min before collection. The levels of P-HER2, P-EGFR, P-AKT, P-S6  
743 and P-ERK, as well as total HER2 and EGFR were assessed by Western blot. GAPDH and  $\beta$ -  
744 tubulin were used as loading controls. Representative blot of three is shown. Densitometry  
745 analysis for P-HER2 (N=3)  $\pm$  s.d. P by Student's t test. (e) MCF10A-HER2 cells were treated  
746 as in (d) and surface receptor biotinylation assay was performed. Surface levels of total HER2  
747 and P-HER2 were assessed. One of two experiments shown. (f) MCF10A-HER2 cells were  
748 treated as in (d) and reversible surface receptor biotinylation assay was performed.  
749 Endocytosed levels of total HER2 and P-HER2 were assessed. One of two experiments shown.

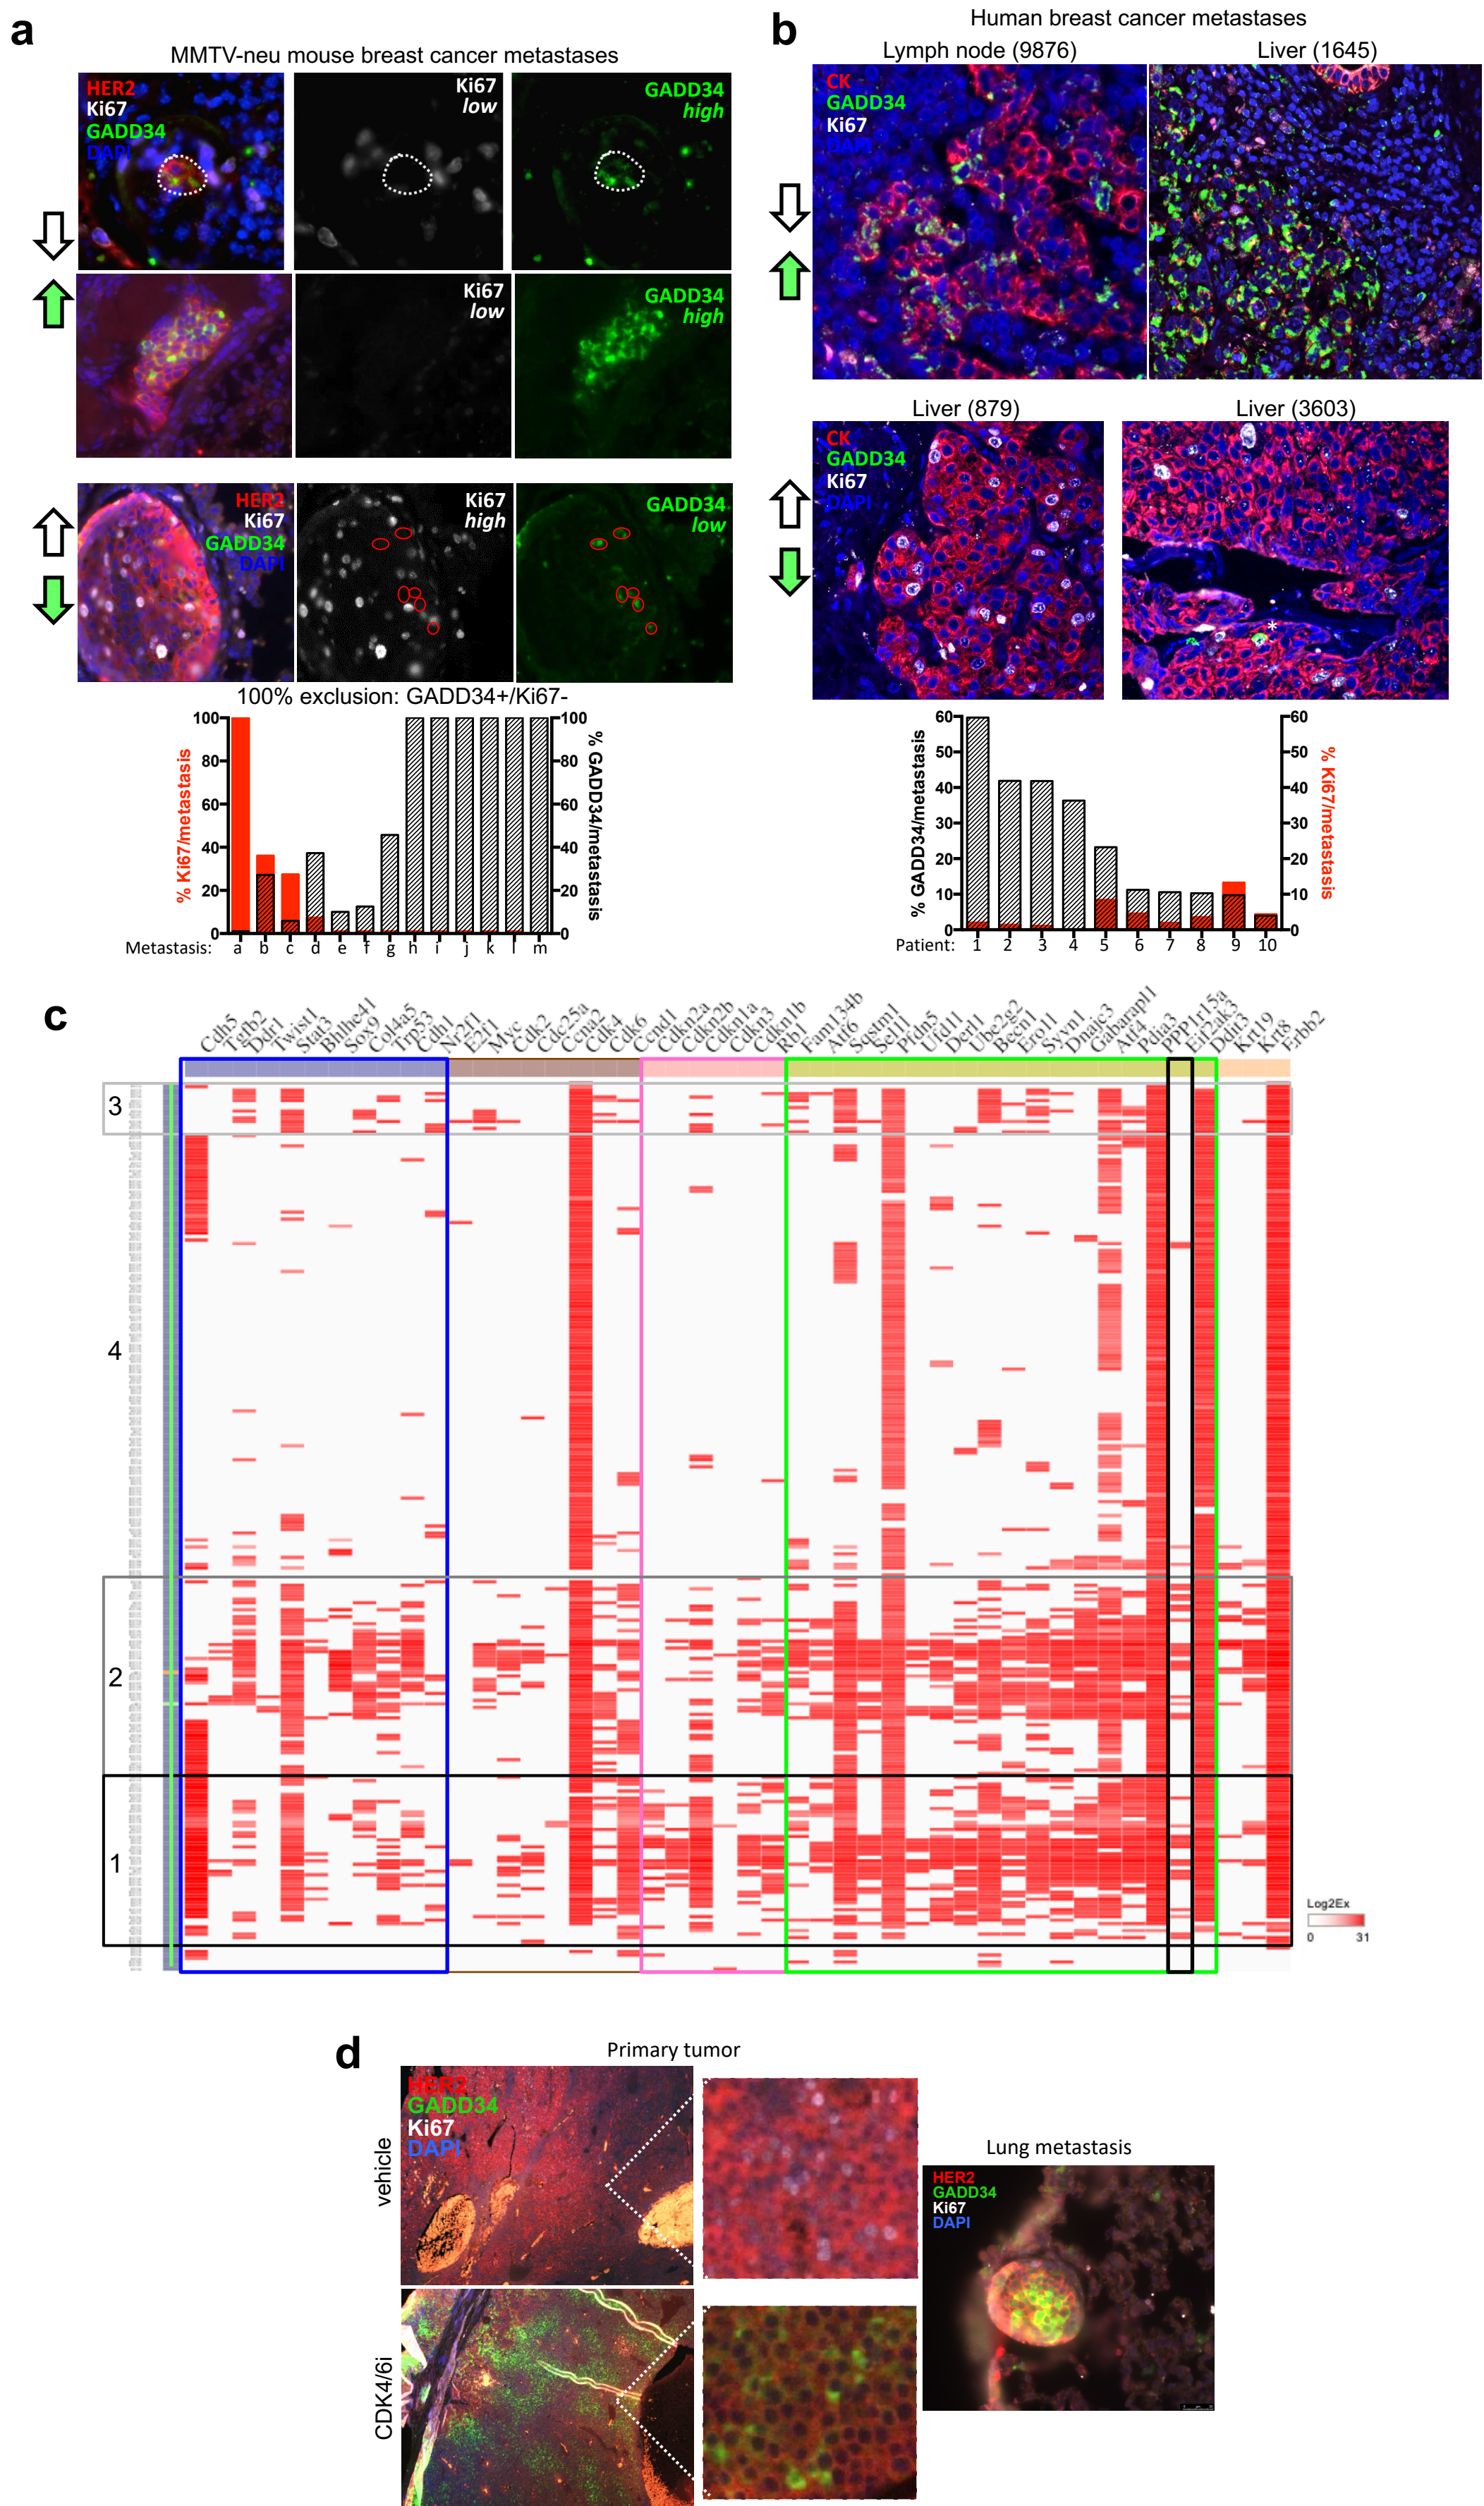

Figure 1



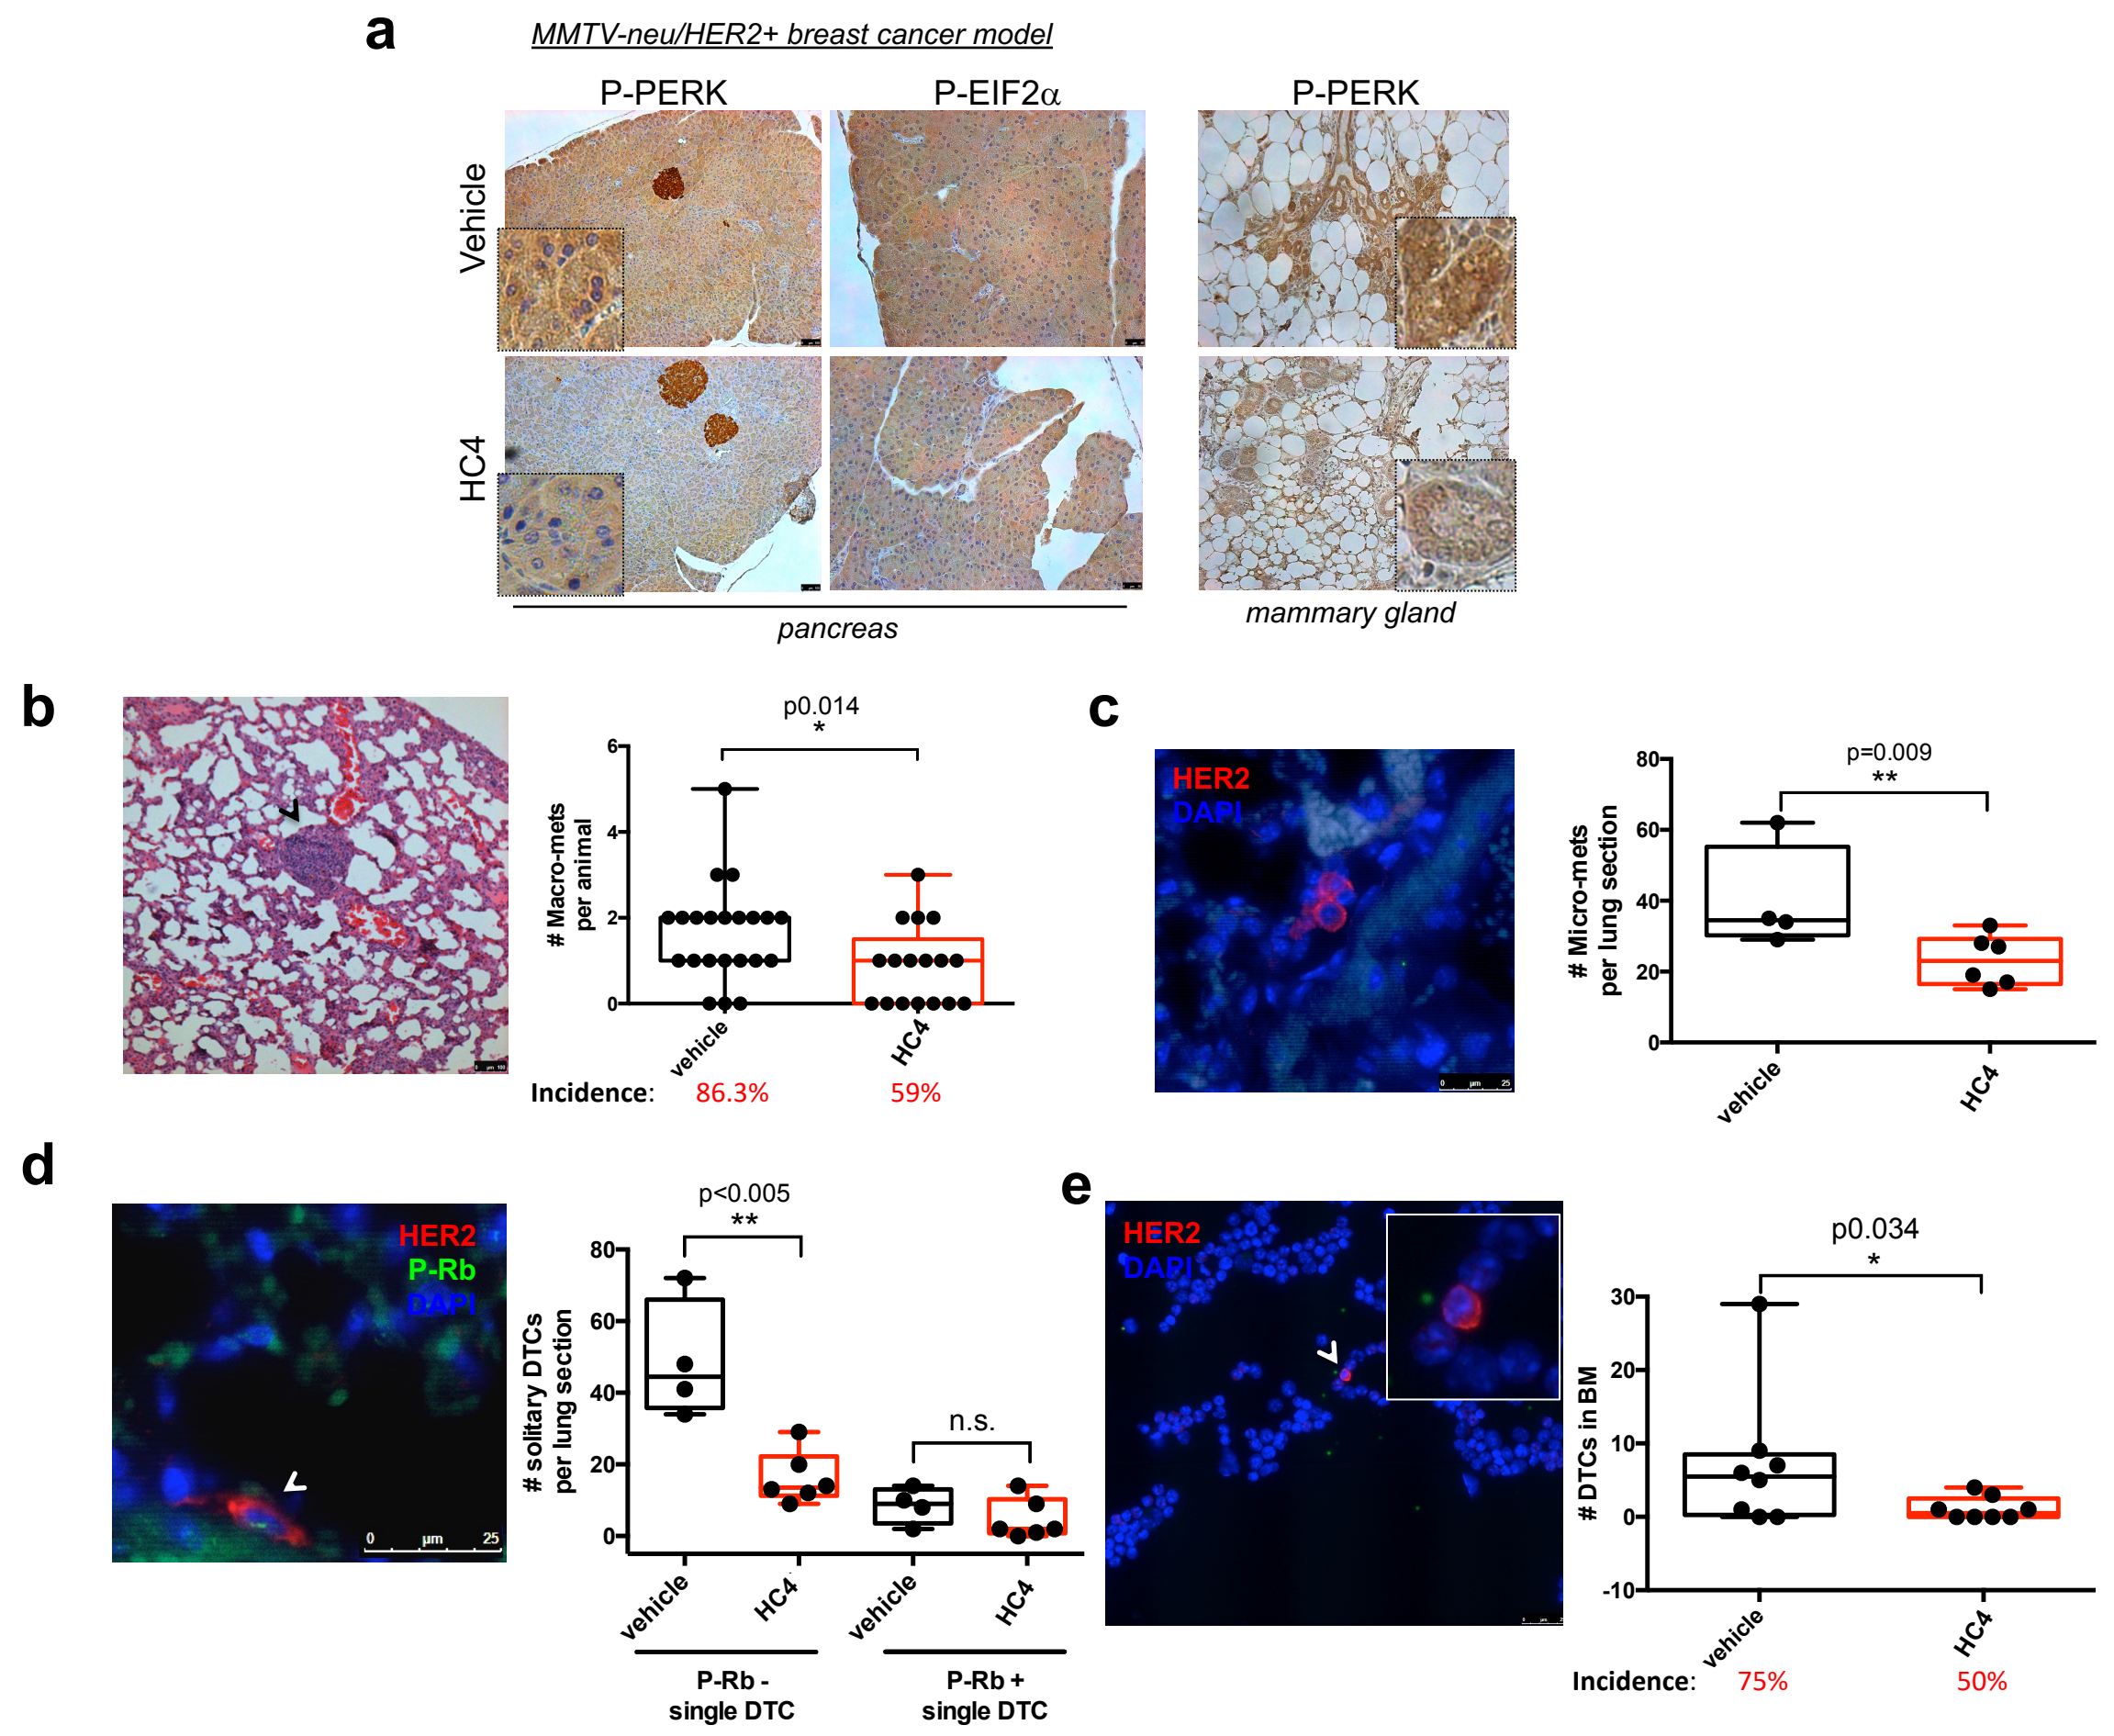

Figure 2

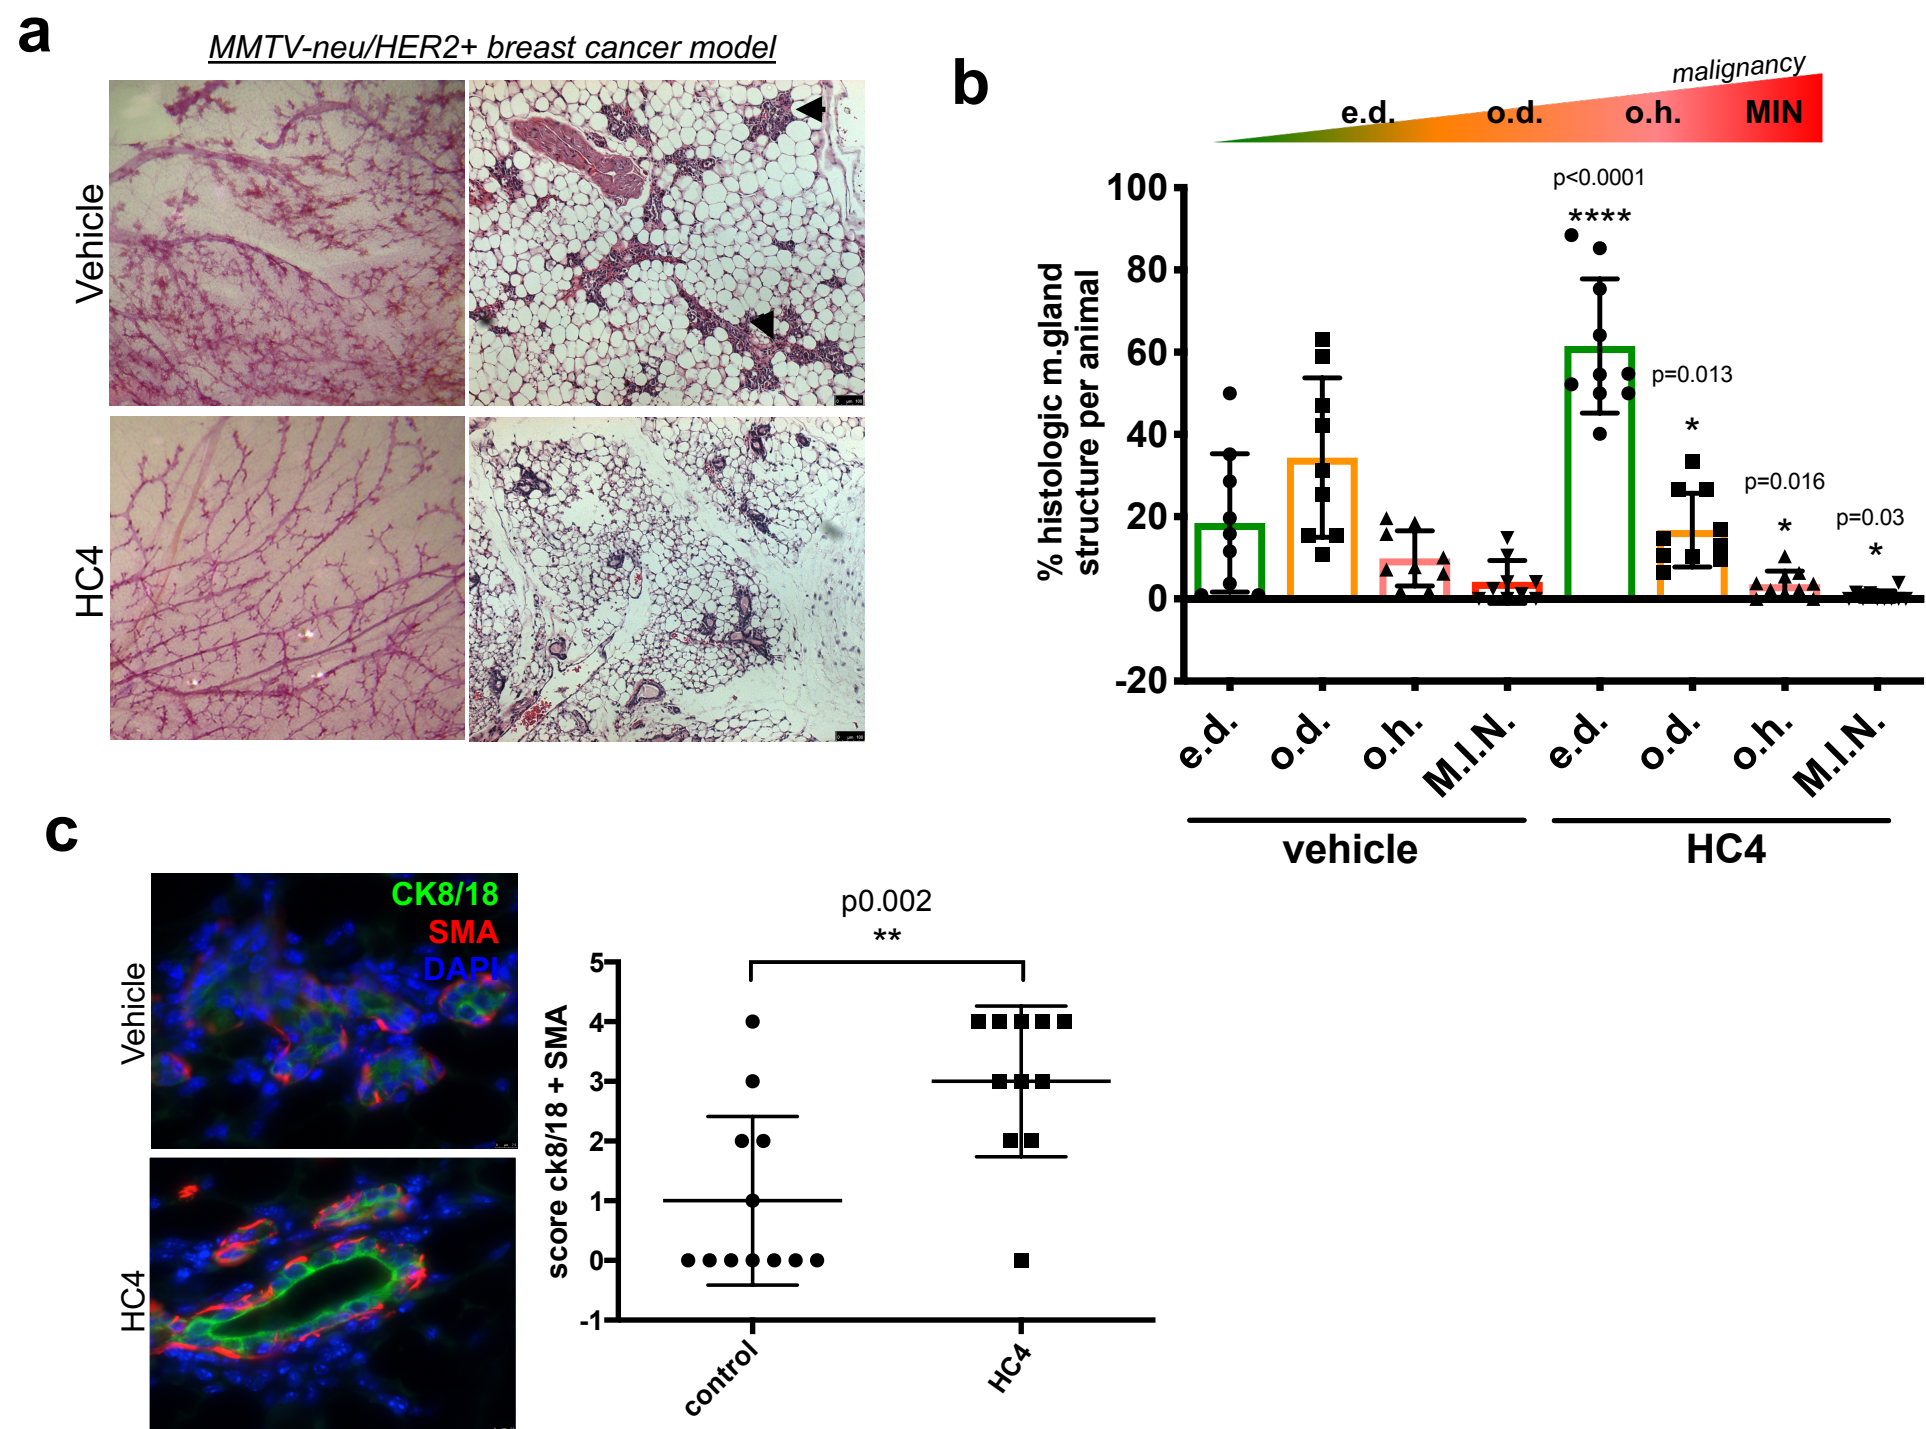

Figure 3



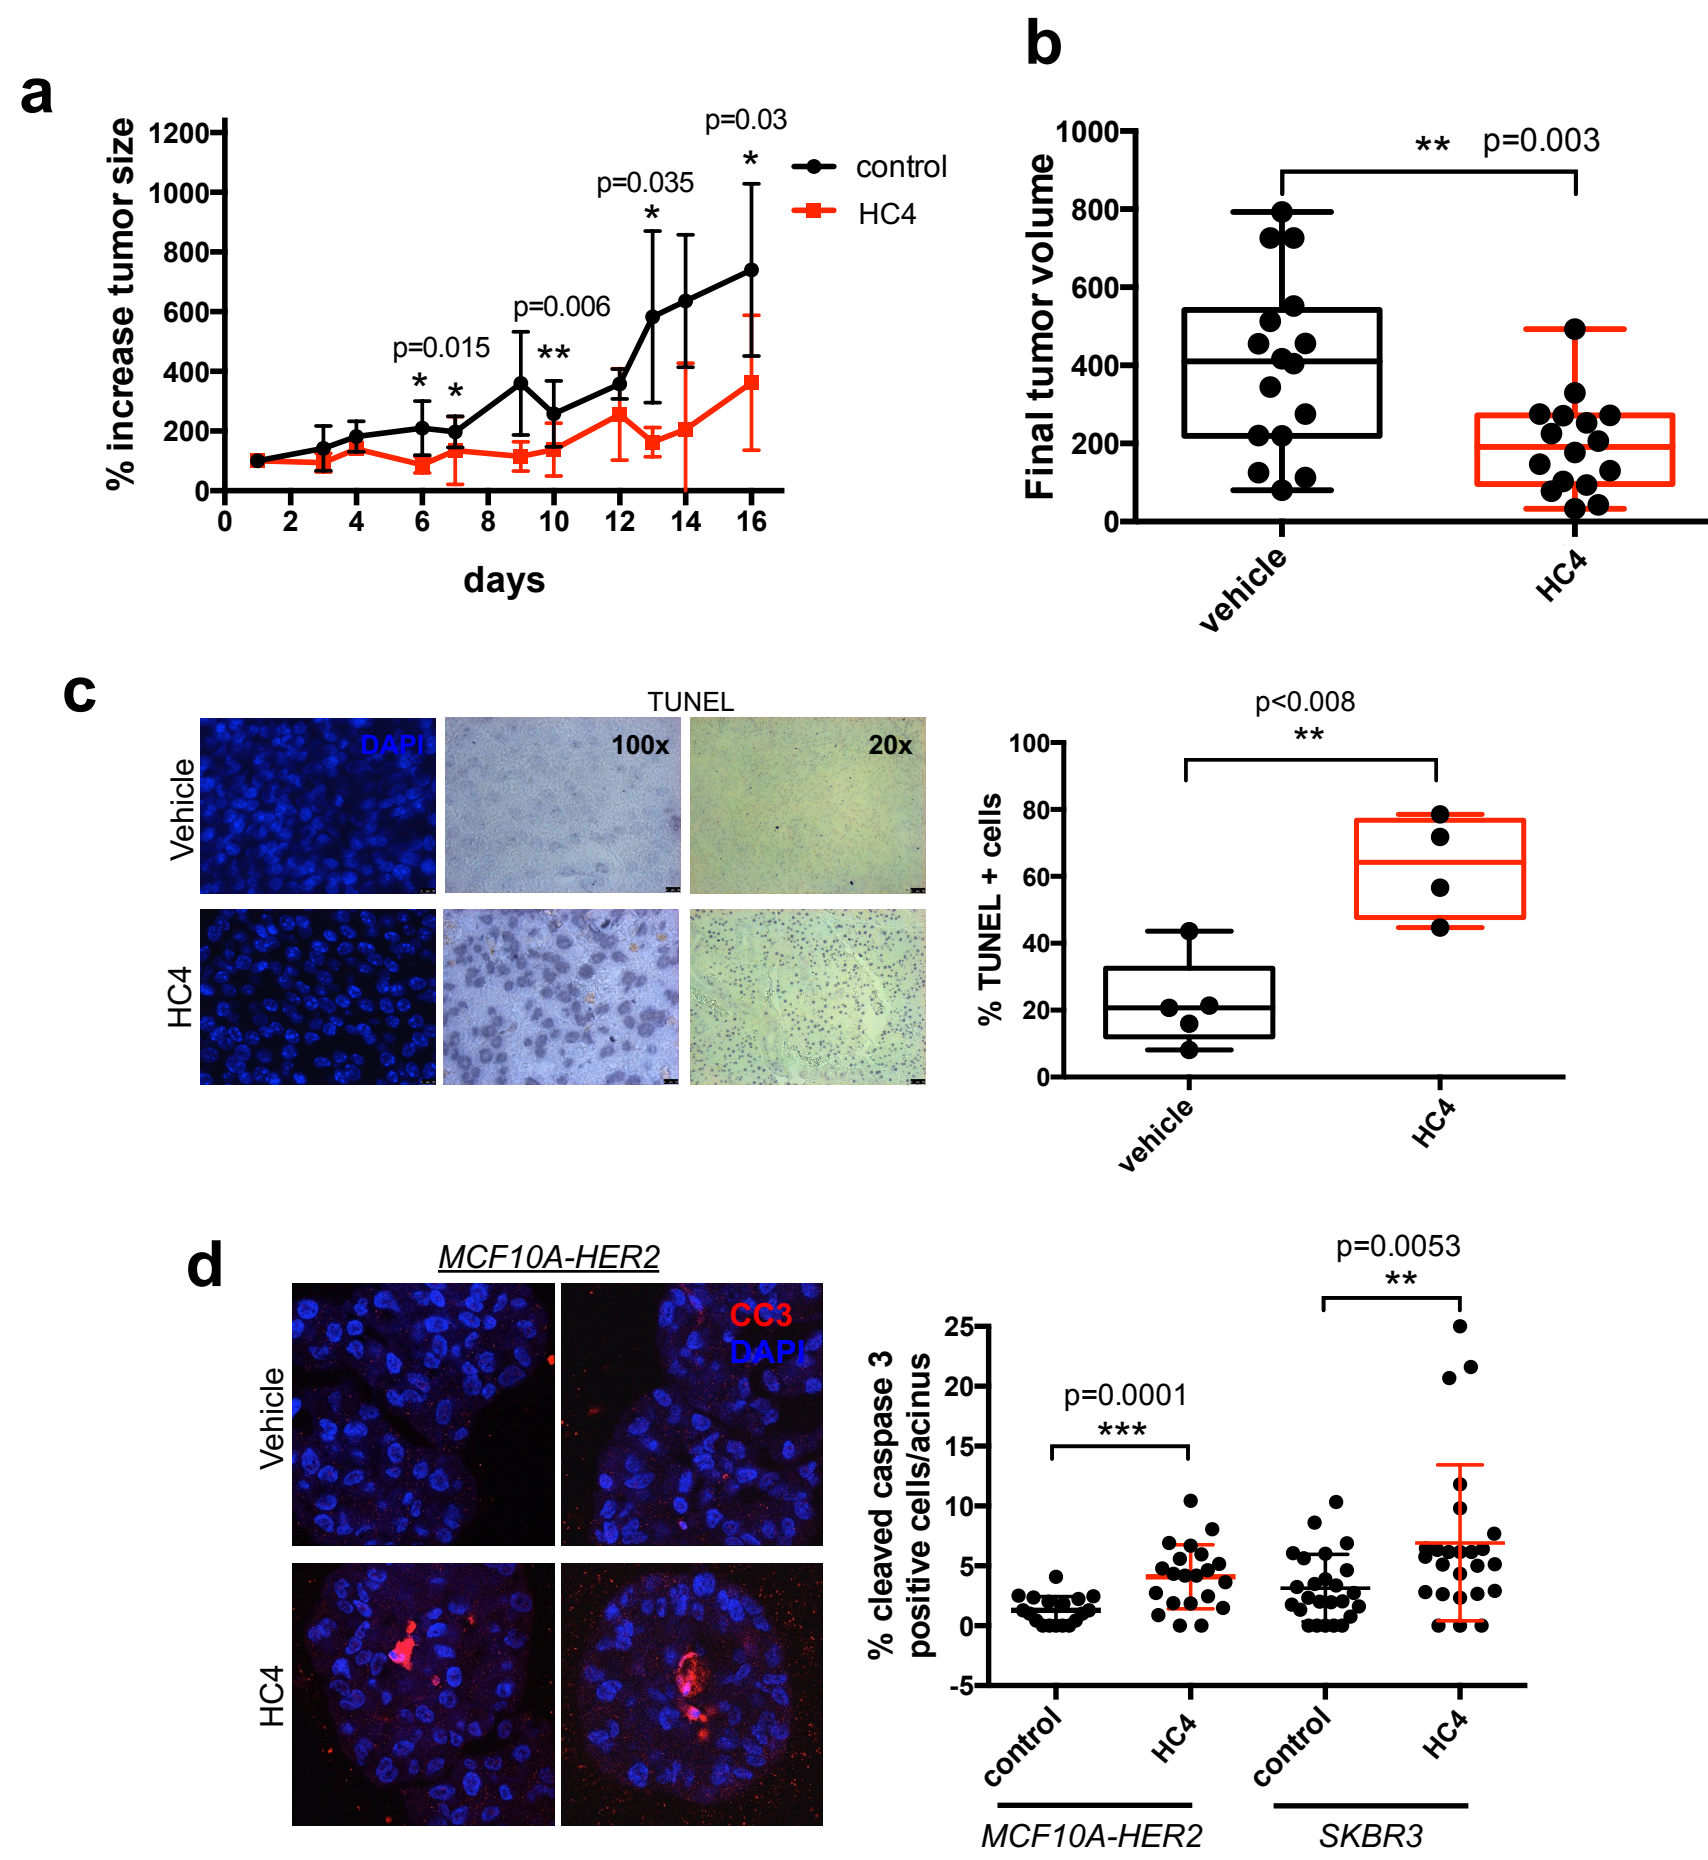

Figure 4



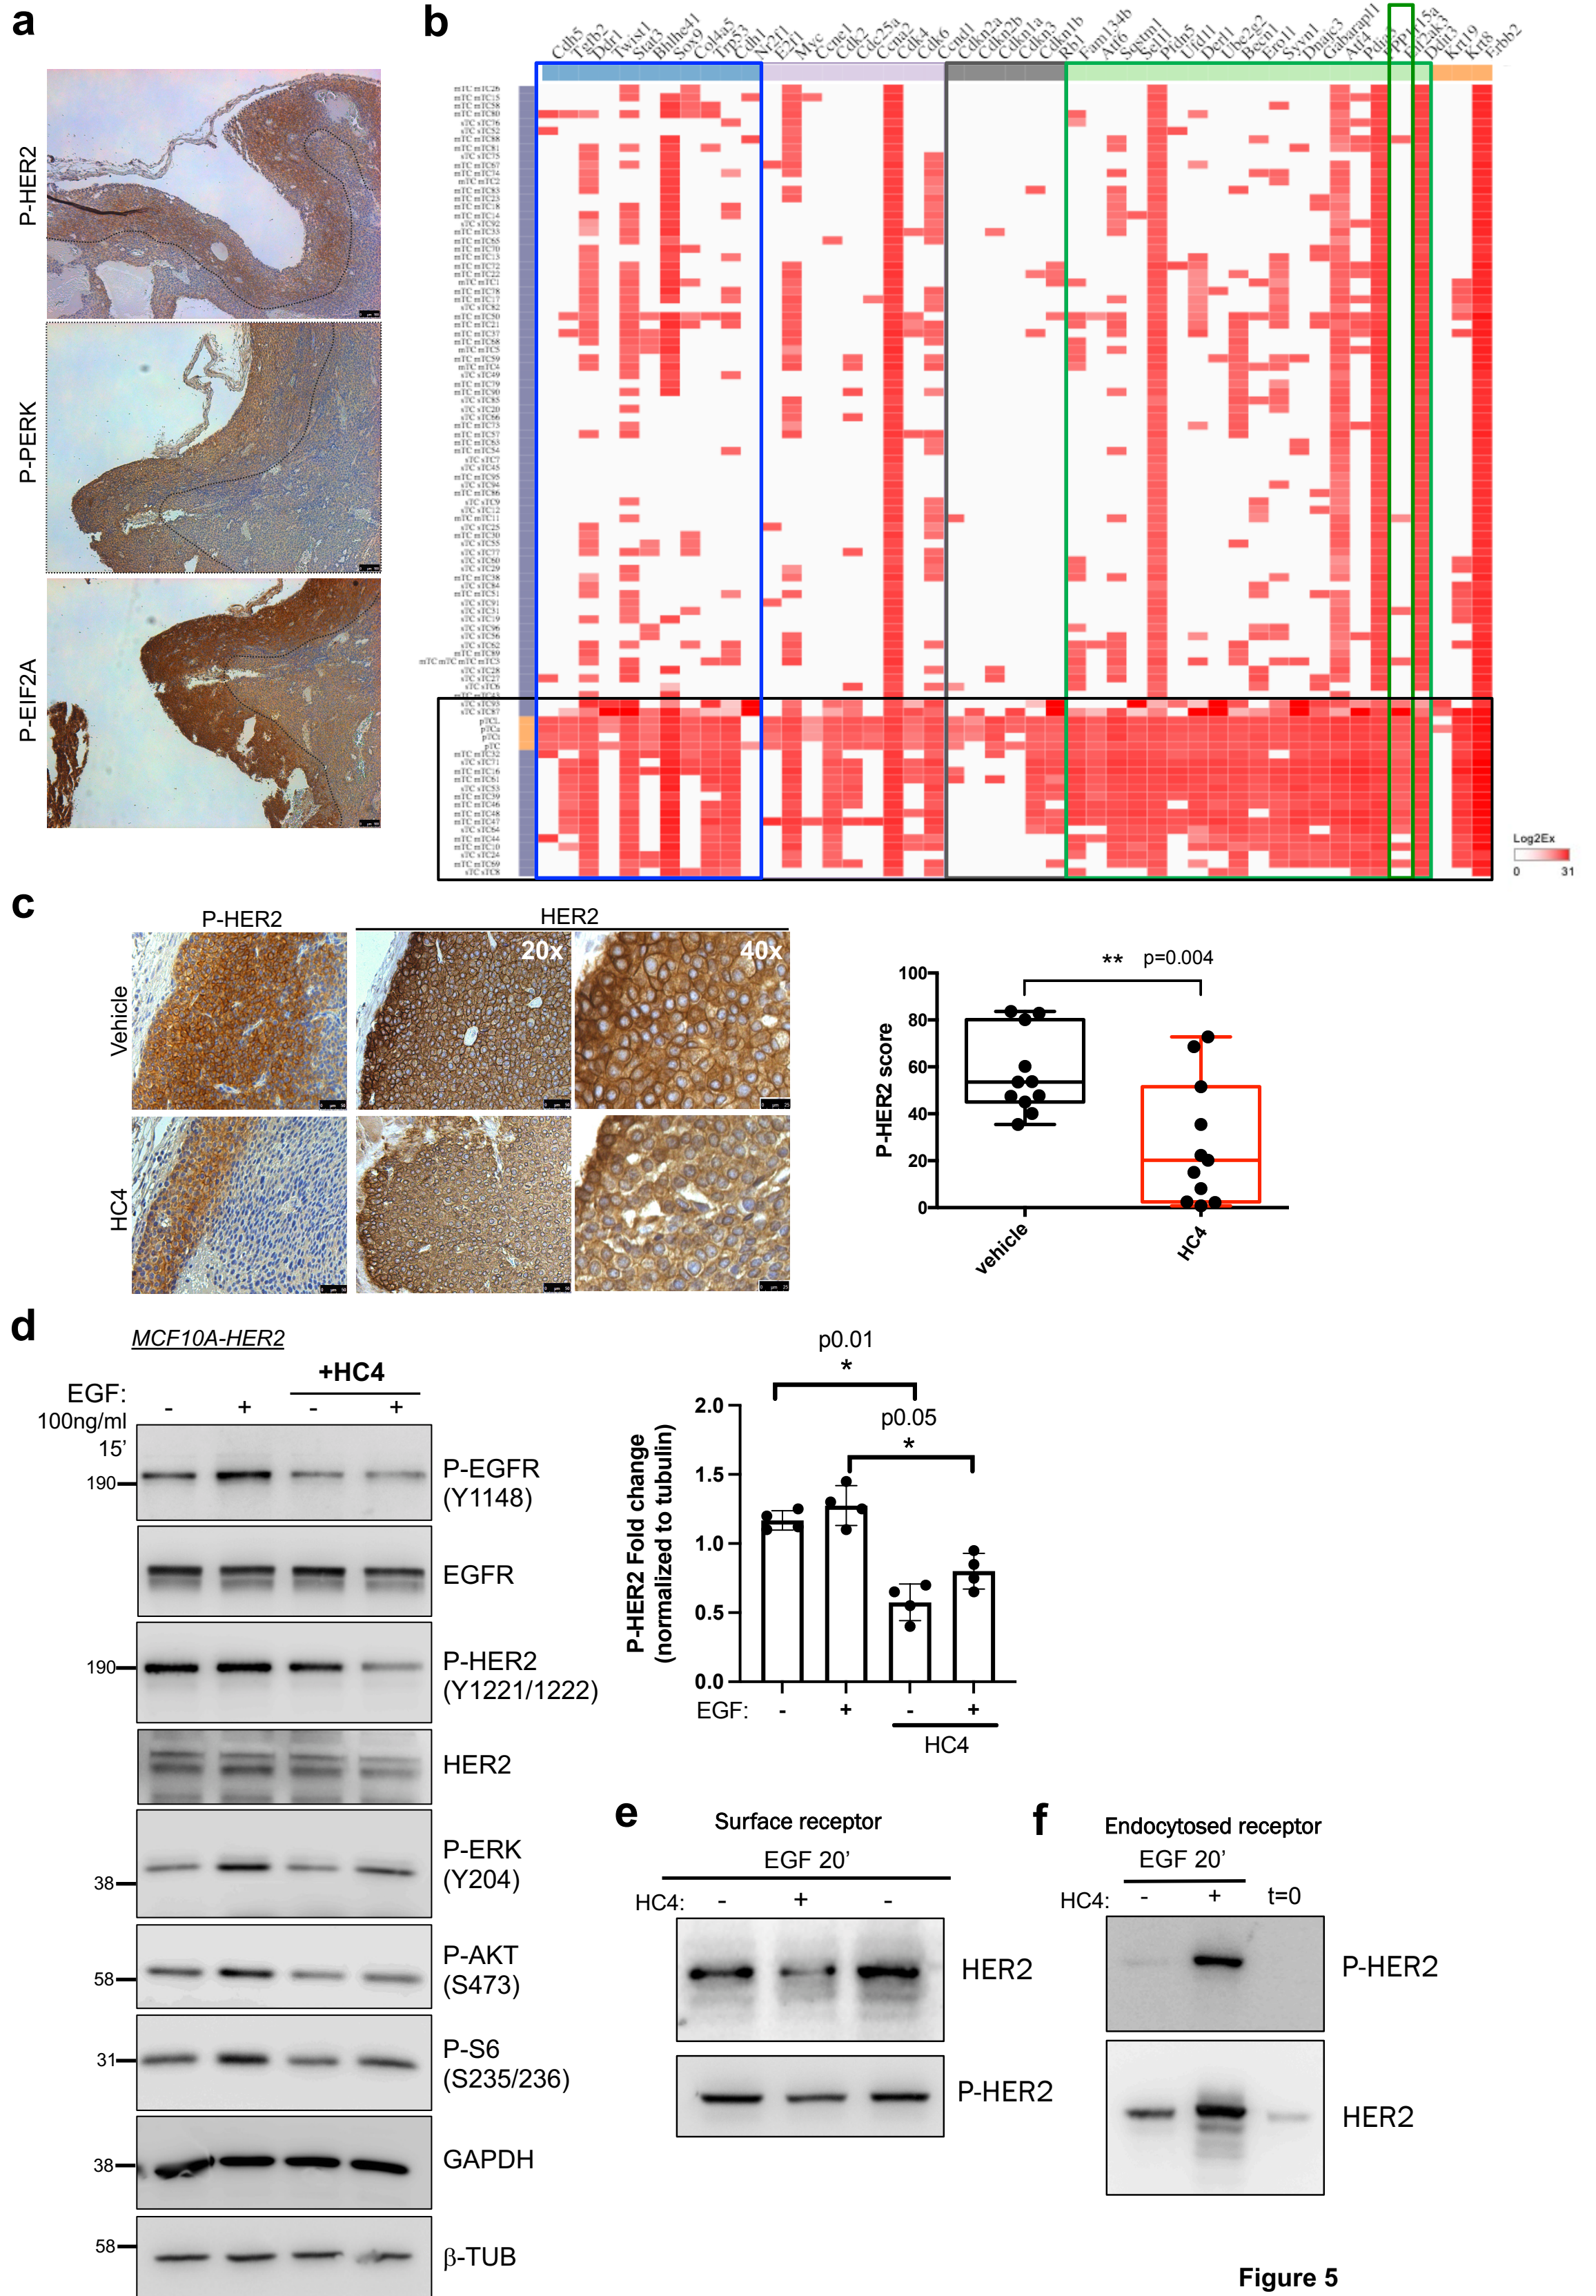

Figure 5
